# Supplementary material for: Multi-ancestry analysis of plasma protein levels influencing and responding to major depression liability
Source: Research Square preprint supplement (doi:10.21203/rs.3.rs-5828682/v1), 2025-01-17
Supplement: Supplementary file 1 [file 25a2013e1b4f24d419ef0a63.xlsx]

## Sheet: Contents
Contents
S. Table 1	Multi-ancestry Mendelian randomization analysis results of protein effects on MDD liability
S. Table 2	Multi-ancestry Mendelian randomization analysis results of MDD PRS effects on proteomic levels
S. Table 3	Multi-ancestry Mendelian randomization analysis results of known drug targets for MDD
S. Table 4	Area under the curve values for observational and reverse MR predictions of MDD using protein levels

## Sheet: S. Table 1
Gene/Protein/exposure	pop	Pqtl/SNP	chr (Build 38)	pos (Build 38)	effect_allele.exposure	other_allele.exposure	effect_allele.outcome	other_allele.outcome	eaf.exposure	eaf.outcome	beta.exposure	beta.outcome	se.exposure	se.outcome	pval.exposure	pval.outcome	mr_beta	mr_se	mr_pval	Q	Qpval
AKT3	AFR	rs320339	1	243707608	T	G	T	G	0.612363	0.5629	0.147343	-0.0098	0.0502788	0.0115	0.00338392	0.3956	-0.0665115	0.0780492	0.394118	2.47661	0.115551
AKT3	EAS	rs320337	1	243651246	G	A	G	A	0.314224	0.3098	-0.033209	-0.0056	0.107919	0.0134	0.758296	0.6774	0.168629	0.403505	0.676013	0.78703	0.375
AKT3	EUR	rs4515770	1	243523611	C	T	C	T	0.217936	0.2199	0.0647252	-0.0191	0.00927641	0.0052	3.01e-12	0.0002428	-0.295094	0.0803397	0.000239647	1.73276	0.188059
AKT3	SAS	rs10927067	1	243759942	A	G	A	G	0.259551	0.26	0.176864	-0.0625	0.0597413	0.0293	0.00307143	0.03273	-0.353379	0.165664	0.032916	0.980485	0.322079
	Combined																-0.189339	0.0525829	0.000158633	5.97688	0.112741
BTN2A1	AFR	rs67777156	6	26633483	A	T	A	T	0.0285352	0.0307	0.369781	0.0225	0.150251	0.0329	0.0138516	0.4929	0.0608468	0.0889716	0.494044	3.63169	0.0566892
BTN2A1	EUR	rs72843784	6	26498530	T	G	T	G	0.110486	0.0999	0.472368	-0.0537	0.0116925	0.0072	1e-200	8.32e-14	-0.113683	0.0152424	8.76e-14	0.106588	0.744062
	Combined																-0.108706	0.0150235	2.31e-13	3.73828	0.0531792
BTN3A2	AFR	rs34878490	6	26370344	T	C	T	C	0.0236308	0.0367	-0.95817	-0.0072	0.148365	0.0301	1.06e-10	0.8105	0.00751432	0.031414	0.810948	1.19462	0.2744
BTN3A2	EAS	rs9393711	6	26370431	T	C	T	C	0.0647521	0.0841	-0.925228	-0.0015	0.180567	0.0216	2.99e-07	0.9433	0.00162122	0.0233456	0.944636	2.96928	0.0848596
BTN3A2	EUR	rs9393711	6	26370431	T	C	T	C	0.133725	0.1248	-0.957454	-0.0457	0.0109983	0.0065	1e-200	2.74e-12	0.0477308	0.00678884	2.05e-12	0.750517	0.386313
BTN3A2	SAS	rs34878490	6	26370344	T	C	T	C	0.0967925	0.0971	-1.01511	-0.0107	0.0809926	0.0412	4.9e-36	0.7954	0.0105407	0.0405867	0.795088	0.595061	0.440469
	Combined																0.0418494	0.00630533	1.6e-11	5.50948	0.138073
CCS	AFR	rs692892	11	66581032	T	C	T	C	0.0496246	0.1377	0.591039	-0.0213	0.116446	0.0181	3.86e-07	0.2394	-0.0360382	0.030624	0.239277	6.35373	0.0117135
CCS	EAS	rs34900764	11	66654505	T	A	T	A	0.39974	0.3795	0.377422	0.0347	0.0880402	0.0134	1.81e-05	0.009335	0.0919395	0.035504	0.00961008	2.04605	0.152602
CCS	EUR	rs498045	11	66595526	G	A	G	A	0.526005	0.5243	0.481208	0.0213	0.00739018	0.0043	1e-200	8.26e-07	0.0442636	0.00893584	7.29e-07	0.121056	0.727892
CCS	SAS	rs498045	11	66595526	G	A	G	A	0.583333	0.5663	0.388236	0.0216	0.044685	0.0266	3.68e-18	0.4169	0.0556363	0.068515	0.416774	0.0446754	0.832602
	Combined																0.0411546	0.00827713	3.31e-07	8.5655	0.0356619
CD40	AFR	rs1569723	20	46113425	A	C	A	C	0.976138	0.9394	0.285913	0.022	0.160102	0.0237	0.0741276	0.354	0.0769465	0.0828923	0.353268	2.20503	0.137562
CD40	EAS	rs4810485	20	46119308	G	T	G	T	0.574239	0.6012	0.48363	-0.0133	0.119483	0.0126	5.17e-05	0.2889	-0.0275004	0.026053	0.291171	0.51204	0.474257
CD40	EUR	rs4810485	20	46119308	G	T	G	T	0.751814	0.7528	0.424289	-0.0242	0.00872004	0.005	1e-200	1.24e-06	-0.0570366	0.0117844	1.3e-06	0.854516	0.355278
CD40	SAS	rs4239702	20	46120612	C	T	C	T	0.7503	0.72	0.381855	0.0455	0.0569606	0.027	2.03e-11	0.09172	0.119155	0.0707075	0.0919528	5.4652	0.0193988
	Combined																-0.0461431	0.0105294	5.87e-06	9.03678	0.0288059
CDH6	AFR	rs1392446	5	30831280	T	C	T	C	0.1323	0.1854	0.653189	0.0216	0.0748552	0.0148	2.64e-18	0.1459	0.0330685	0.0226581	0.144439	9.53e-06	0.997536
CDH6	EAS	rs4413540	5	30814573	T	C	T	C	0.154762	0.1102	0.267914	0.0194	0.127034	0.0206	0.0349454	0.3459	0.0724113	0.0768903	0.346322	0.262742	0.608243
CDH6	EUR	rs4626350	5	30839344	A	G	A	G	0.555131	0.552	0.510324	0.0155	0.00753871	0.0043	1e-200	0.0003513	0.0303729	0.00842602	0.000312572	0.0971061	0.75533
CDH6	SAS	rs12517438	5	30841947	G	T	G	T	0.491544	0.4442	0.544099	0.0529	0.0473114	0.0251	1.31e-30	0.03487	0.097225	0.0461313	0.0350682	1.93836	0.163846
	Combined																0.0329986	0.00774477	1.02e-05	2.29822	0.512862
DPT	AFR	rs6427147	1	168737022	T	C	T	C	0.900978	0.8387	0.377057	-0.0022	0.081935	0.0173	4.19e-06	0.9007	-0.00583466	0.0458817	0.898808	0.00133586	0.970844
DPT	EAS	rs567067	1	168727311	C	G	C	G	0.232298	0.2319	0.233374	0.0205	0.0899989	0.0159	0.00951218	0.1974	0.0878418	0.068131	0.197291	1.8234	0.176909
DPT	EUR	rs6427147	1	168737022	T	C	T	C	0.749426	0.743	0.362924	-0.0035	0.00795916	0.005	1e-200	0.4771	-0.00964389	0.013777	0.483927	0.158574	0.690473
DPT	SAS	rs1018454	1	168728523	C	A	C	A	0.431446	0.385	0.345491	0.0188	0.042706	0.0266	5.97e-16	0.4807	0.0544153	0.0769919	0.479711	0.578769	0.446795
	Combined																-0.00415771	0.0127747	0.372415	2.56208	0.464176
DSG3	AFR	rs10084010	18	31447782	T	C	T	C	0.167052	0.1755	-0.272056	-0.014	0.0683438	0.0158	6.87e-05	0.3778	0.05146	0.0580763	0.375577	0.0256854	0.872671
DSG3	EAS	rs8092559	18	31454040	T	A	T	A	0.154099	0.1488	-0.323829	-0.0143	0.1076	0.0182	0.00261619	0.4315	0.0441591	0.0562025	0.432035	0.087328	0.767602
DSG3	EUR	rs10084010	18	31447782	T	C	T	C	0.172871	0.1743	-0.313033	-0.0211	0.00926797	0.0057	1e-200	0.0002088	0.067405	0.0182089	0.000214114	0.132868	0.715477
DSG3	SAS	rs8094212	18	31454341	C	T	C	T	0.35425	0.3427	-0.441231	-0.008	0.050817	0.0263	3.86e-18	0.7598	0.0181311	0.059606	0.760989	0.511665	0.474419
	Combined																0.0607677	0.0159913	7.23e-05	0.757546	0.859592
FES	AFR	rs2521501	15	90894158	T	A	T	A	0.219315	0.2273	-0.127499	0.0163	0.0611413	0.0148	0.0370399	0.2712	-0.127844	0.116079	0.270744	2.8126	0.0935268
FES	EAS	rs6227	15	90882002	T	C	T	C	0.0762035	0.0769	0.262113	-0.0528	0.195172	0.0255	0.179277	0.03854	-0.20144	0.0972863	0.0383973	7.60398	0.00582395
FES	EUR	rs1894401	15	90885812	A	G	A	G	0.523034	0.526	0.133012	0.0163	0.00765013	0.0044	1.04e-67	0.000181	0.122545	0.0330797	0.00021177	2.83676	0.0921298
FES	SAS	rs2071382	15	90884967	C	T	C	T	0.611291	0.6105	0.187218	-0.0175	0.0513526	0.0263	0.000266631	0.5058	-0.0934739	0.140478	0.505795	1.30219	0.253814
	Combined																0.0668302	0.0295605	0.011886	14.5555	0.00223871
HLA-E	AFR	rs9265949	6	31347452	T	C	T	C	0.028986	0.037	0.385375	-0.0216	0.134567	0.0299	0.00418581	0.4714	-0.0560493	0.0775868	0.470044	0.239254	0.624746
HLA-E	EAS	rs2523571	6	31361914	A	T	A	T	0.0294041	0.032	0.353553	0.0162	0.248617	0.0356	0.155003	0.6492	0.0458206	0.100692	0.649069	0.402972	0.525559
	Combined																-0.0180988	0.0614584	0.384192	0.642226	0.422906
ISLR2	AFR	rs351242	15	74180375	A	G	A	G	0.622463	0.6507	-0.106712	-0.0028	0.047745	0.0128	0.0254138	0.8272	0.0262388	0.119949	0.826845	0.152445	0.69621
ISLR2	EAS	rs351242	15	74180375	A	G	A	G	0.951464	0.9729	0.153734	0.0205	0.243105	0.0518	0.52714	0.6921	0.133347	0.336946	0.692287	0.0320006	0.858026
ISLR2	EUR	rs34868798	15	74177375	C	T	C	T	0.223506	0.2195	0.246346	0.0183	0.00849267	0.0052	5.38e-185	0.0004257	0.0742858	0.0211085	0.0004328	0.00330658	0.954145
	Combined																0.073072	0.0207496	0.000214471	0.187752	0.910396
ITIH3	AFR	rs4687552	3	52804386	C	T	C	T	0.238299	0.2453	0.550986	-0.0103	0.0610846	0.013	1.88e-19	0.4258	-0.0186938	0.0235941	0.428181	0.938458	0.332675
ITIH3	EAS	rs11714030	3	52731866	T	C	T	C	0.421119	0.4528	0.074078	-0.0024	0.0958502	0.0125	0.43961	0.8503	-0.0323983	0.168741	0.847742	0.00294165	0.956746
ITIH3	EUR	rs9881468	3	52794612	T	C	T	C	0.343107	0.347	0.310498	-0.0156	0.00749889	0.0045	1e-200	0.0005684	-0.0502419	0.0144928	0.000526955	0.359658	0.548696
	Combined																-0.0415503	0.0123162	0.000370929	1.30106	0.52177
LTBP2	AFR	rs888414	14	74638202	A	G	A	G	0.485746	0.4766	-0.179253	-0.006	0.043774	0.0121	4.22e-05	0.622	0.0334722	0.0675024	0.619988	4.09221	0.0430813
LTBP2	EAS	rs12892228	14	74641587	T	C	T	C	0.131893	0.1161	-0.188207	0.0294	0.133216	0.0189	0.157716	0.12	-0.156211	0.100421	0.119814	0.279929	0.596748
LTBP2	EUR	rs888414	14	74638202	A	G	A	G	0.38259	0.3858	-0.105376	0.0154	0.00645187	0.0044	5.78e-60	0.0005316	-0.146143	0.0417552	0.000465258	1.06365	0.302384
	Combined																-0.10308	0.033479	0.00103871	5.43579	0.0660135
SPRY2	AFR	rs9601361	13	80369370	A	C	A	C	0.0965017	0.1192	0.159106	0.0026	0.0839958	0.0181	0.0581969	0.8871	0.0163413	0.113761	0.88578	1.59327	0.206859
SPRY2	EAS	rs35251159	13	80401412	T	C	T	C	0.176534	0.1671	0.190749	0.0159	0.130448	0.0179	0.14367	0.3744	0.0833556	0.0938406	0.374397	0.665959	0.414464
SPRY2	EUR	rs504122	13	80337390	A	G	A	G	0.369756	0.3618	-0.0819766	-0.018	0.0078416	0.0045	1.4e-25	5.83e-05	0.219575	0.0548937	6.33e-05	1.18038	0.277279
	Combined																0.159935	0.04374	0.000127837	3.43961	0.179101
SSC4D	AFR	rs12540573	7	76409696	C	A	C	A	0.155458	0.1563	0.658013	0.0129	0.067537	0.0155	1.98e-22	0.4045	0.0196045	0.0235558	0.405263	0.000556526	0.981179
SSC4D	EAS	rs62476839	7	76409320	C	G	C	G	0.160714	0.1654	0.3422	-0.0241	0.129058	0.0209	0.00801309	0.2505	-0.0704267	0.0610754	0.248865	2.19987	0.138022
SSC4D	EUR	rs142601006	7	76386122	A	G	A	G	0.0171247	0.0185	0.864521	0.0252	0.0273231	0.0163	1e-200	0.1226	0.0291491	0.0188544	0.122102	0.227295	0.633537
	Combined																0.0201602	0.0143101	0.0794457	2.42772	0.297048
TIMP4	AFR	rs184262	3	12093240	G	A	G	A	0.830327	0.8415	0.227624	0.0148	0.0578966	0.016	8.44e-05	0.3547	0.0650195	0.0702914	0.354966	2.62398	0.10526
TIMP4	EAS	rs217049	3	12019417	T	C	T	C	0.955434	0.9588	0.591903	-0.1006	0.225991	0.035	0.00881495	0.00409	-0.16996	0.0591313	0.00404942	4.19541	0.0405335
TIMP4	EUR	rs184262	3	12093240	G	A	G	A	0.828066	0.8289	0.447192	-0.021	0.00950942	0.0057	1e-200	0.0002477	-0.0469597	0.0127462	0.000229413	0.0218398	0.882514
	Combined																-0.0488434	0.0122687	3.43e-05	6.84123	0.0326923
TNR	AFR	rs12028779	1	175624945	C	T	C	T	0.554941	0.523	-0.0962798	-0.0073	0.0501893	0.0117	0.0550694	0.5319	0.0758207	0.121521	0.532672	0.877362	0.348925
TNR	EAS	rs12073396	1	175621025	T	G	T	G	0.508861	0.4968	-0.319235	0.0085	0.0922813	0.0123	0.000541452	0.4895	-0.0266262	0.0385296	0.48953	0.0872172	0.767745
TNR	EUR	rs2235256	1	175599911	G	A	G	A	0.450999	0.4359	-0.365358	0.0147	0.00603874	0.0044	1e-200	0.0007956	-0.0402345	0.012043	0.000835046	0.0342749	0.853123
	Combined																-0.0380049	0.0114435	0.000448326	0.998854	0.606878

## Sheet: S. Table 2
pop	prot	beta	se	pval	n	fdr
EUR	abl1	0.0166717	0.00352187	2.21e-06	47425	3.56e-05
EUR	acaa1	0.0277486	0.00425439	6.99e-11	46504	2.28e-09
EUR	acan	-0.00584359	0.00148469	8.3e-05	47218	0.00102051
EUR	ace2	0.0222293	0.00267713	1.04e-16	46767	7.23e-15
SAS	ace2	0.0608768	0.0195471	0.00189896	958	0.0166858
EUR	acp5	0.0127518	0.0016702	2.3e-14	47866	1.24e-12
AFR	acta2	0.0430532	0.0138286	0.00188761	1402	0.0166611
SAS	acta2	0.0440847	0.0140073	0.00169992	956	0.0151876
EUR	acvrl1	0.0100231	0.00130255	1.44e-14	47151	8.04e-13
EUR	acy1	0.0226647	0.00334473	1.25e-11	47686	4.62e-10
EUR	adamts15	0.0253276	0.00229177	2.33e-28	47300	6.5e-26
EUR	adamts16	0.00693221	0.00138297	5.39e-07	46627	9.56e-06
EUR	adamts8	-0.0192624	0.00234177	1.99e-16	47807	1.32e-14
EUR	adgrg1	0.0224048	0.00356483	3.31e-10	47331	9.54e-09
EUR	adgrg2	-0.00746415	0.00142406	1.6e-07	47684	3.05e-06
EUR	adh4	0.0275846	0.00460193	2.06e-09	46801	5.38e-08
EUR	adm	0.0169463	0.00151982	7.75e-29	48054	2.39e-26
SAS	adm	0.0318947	0.0106727	0.00287446	989	0.0241686
EUR	agr2	0.0140118	0.0051097	0.0061054	46121	0.045865
EUR	agr3	0.0216201	0.00299122	4.98e-13	46391	2.14e-11
AFR	agrn	0.0363575	0.0109988	0.000971446	1431	0.00933842
EUR	agrn	0.0141046	0.00175855	1.08e-15	47811	6.77e-14
SAS	agrn	0.0403915	0.012155	0.000923752	984	0.00894999
EUR	agxt	0.0212232	0.00400605	1.18e-07	47690	2.3e-06
SAS	agxt	0.0886427	0.0287363	0.00209584	975	0.0182513
EUR	ahcy	0.0135706	0.00351932	0.0001154	47686	0.00136982
EUR	aifm1	0.0280687	0.00544533	2.55e-07	47365	4.72e-06
EUR	akr1b1	0.0114045	0.00378698	0.00260089	46471	0.0220586
EUR	alcam	0.00466387	0.000987969	2.36e-06	48242	3.79e-05
EUR	aldh3a1	0.0213481	0.00322089	3.44e-11	47368	1.17e-09
AFR	alpp	0.144118	0.0432271	0.000878323	1429	0.00855233
EUR	alpp	0.0704278	0.00634728	1.43e-28	47441	4.17e-26
EUR	ambp	0.0129992	0.00104903	3.28e-35	47974	2.13e-32
SAS	ambp	0.0221554	0.00752667	0.00332142	988	0.0272991
EUR	amn	0.013627	0.00239126	1.21e-08	46712	2.73e-07
EUR	amy2a	-0.00970954	0.0024953	9.99e-05	45856	0.00120068
EUR	amy2b	-0.00980615	0.00254449	0.000116427	44462	0.00137922
EUR	ang	0.0144326	0.00171022	3.29e-17	47465	2.47e-15
EUR	angpt2	0.00850394	0.00199472	2.02e-05	48039	0.000272831
EUR	angptl2	0.0139695	0.00213192	5.71e-11	47708	1.93e-09
EUR	angptl4	0.0137545	0.0023691	6.45e-09	47797	1.53e-07
EUR	angptl7	0.006692	0.00182603	0.000247809	47994	0.00272079
EUR	anxa10	0.0298327	0.00410927	3.94e-13	46491	1.73e-11
EUR	aoc3	0.00475251	0.00152999	0.00189598	47847	0.0166846
EUR	apbb1ip	0.00720245	0.00223662	0.0012817	47276	0.0119816
EUR	apex1	0.00874606	0.00305568	0.0042085	47879	0.0333714
EUR	aplp1	-0.0125197	0.00269229	3.32e-06	47687	5.2e-05
EUR	apoh	0.00662337	0.00178058	0.000199622	47603	0.00223363
EUR	apom	-0.00422071	0.00144005	0.00338077	47750	0.0277091
EUR	areg	0.0112167	0.00227848	8.56e-07	47364	1.47e-05
EUR	arg1	-0.00741276	0.00272721	0.00656868	47370	0.0489057
EUR	arhgef12	0.0203035	0.00540585	0.000172961	47589	0.00196157
EUR	arsa	0.0119069	0.0022644	1.46e-07	47655	2.8e-06
EUR	arsb	0.013169	0.00282697	3.2e-06	47428	5.03e-05
EUR	art3	-0.00622776	0.00175297	0.00038167	47840	0.00407579
EUR	asah2	0.0174874	0.00261012	2.11e-11	47204	7.57e-10
EUR	asgr1	0.0223843	0.0016191	2.18e-43	47272	6.39e-40
EUR	atox1	0.0168839	0.00368033	4.49e-06	47808	6.81e-05
EUR	atp5if1	0.0188242	0.00567321	0.000907052	47876	0.00880277
EUR	axin1	0.0185731	0.00498643	0.00019575	47589	0.0021945
EUR	b4galt1	0.00415854	0.0013983	0.00294096	47841	0.024669
SAS	b4galt1	0.0311578	0.00968327	0.00133501	985	0.0123615
EUR	bach1	0.0123482	0.00382587	0.0012494	47586	0.0117548
EUR	bag3	0.00868575	0.00198404	1.2e-05	47113	0.000168198
EUR	baiap2	0.021312	0.00334697	1.94e-10	46491	5.94e-09
EUR	bank1	0.019291	0.00552751	0.000483464	47589	0.0050522
EUR	bax	0.0200524	0.00463638	1.53e-05	46458	0.000209964
EUR	bcan	-0.0102979	0.0018306	1.86e-08	47290	4.09e-07
EUR	bcl2l11	0.00920396	0.00220275	2.94e-05	47542	0.000387634
EUR	bcr	0.0164883	0.00474315	0.000508961	47589	0.00528092
EUR	boc	-0.00698053	0.00120505	6.97e-09	46788	1.63e-07
EUR	brk1	0.00693575	0.00228384	0.00239169	46515	0.0204922
EUR	bsg	0.0062171	0.000981735	2.43e-10	48011	7.22e-09
EUR	bst2	0.0233251	0.00256329	9.4e-20	47966	1e-17
EUR	btn3a2	0.0318641	0.00190144	7.52e-63	47542	4.4e-59
EUR	c19orf12	0.0161752	0.00321735	4.99e-07	46413	8.9e-06
EUR	c1qtnf1	0.0100038	0.00215677	3.52e-06	47796	5.46e-05
EUR	c2	0.0048354	0.00110522	1.22e-05	47648	0.000169522
EUR	c4bpb	0.0103015	0.00203169	3.98e-07	47793	7.17e-06
EUR	ca14	-0.0131094	0.00189526	4.67e-12	48050	1.82e-10
EUR	ca4	0.00805158	0.00123171	6.34e-11	48252	2.11e-09
EUR	ca5a	0.0303606	0.00480542	2.67e-10	46789	7.86e-09
EUR	ca6	-0.0350657	0.00328992	1.7e-26	47515	3.99e-24
EUR	calb2	0.0113866	0.00155361	2.35e-13	46489	1.11e-11
EUR	calca	0.0101428	0.00317408	0.00139678	47187	0.0128521
EUR	camkk1	0.00887941	0.00222606	6.65e-05	46449	0.000824421
EUR	cant1	0.00680863	0.00104051	6.07e-11	47523	2.04e-09
EUR	capg	0.0196416	0.0030416	1.07e-10	47238	3.4e-09
EUR	casp2	0.0113072	0.00347741	0.00114831	47560	0.0108736
EUR	cblif	0.0113866	0.0036171	0.00164491	47516	0.0147865
EUR	cbln4	-0.0043225	0.00156046	0.00560759	47968	0.0429189
EUR	cc2d1a	0.0127452	0.00389905	0.00108079	47294	0.0103178
EUR	ccdc80	0.0135844	0.00182935	1.14e-13	47662	5.65e-12
EUR	ccl15	0.010573	0.0022036	1.61e-06	48253	2.66e-05
EUR	ccl16	0.0248836	0.0026084	1.5e-21	48201	2.03e-19
EUR	ccl17	0.0250506	0.00473137	1.2e-07	47556	2.34e-06
EUR	ccl18	0.0243628	0.00339962	7.82e-13	46848	3.31e-11
EUR	ccl19	0.0307831	0.00599826	2.88e-07	47940	5.3e-06
EUR	ccl20	0.0261604	0.00438215	2.39e-09	48063	6.11e-08
EUR	ccl21	0.01068	0.00194164	3.81e-08	47740	7.96e-07
EUR	ccl22	0.0207487	0.00270694	1.82e-14	47134	9.88e-13
EUR	ccl23	0.00818707	0.00211453	0.000108168	47869	0.00128812
EUR	ccl27	0.0110344	0.00309941	0.000371	47677	0.00396909
EUR	ccl3	0.0176442	0.00242803	3.74e-13	47452	1.67e-11
EUR	ccl4	0.0122119	0.00289164	2.41e-05	47423	0.000324654
EUR	ccl5	0.0304597	0.00523553	6e-09	47841	1.44e-07
EUR	ccl7	0.0266149	0.00287122	1.95e-20	47454	2.42e-18
EUR	ccl8	0.0102467	0.00310264	0.000958738	47975	0.00924306
EUR	ccn1	0.0139982	0.00391772	0.000353195	47361	0.00379247
EUR	ccn3	0.00819495	0.00171394	1.75e-06	48131	2.87e-05
AFR	ccn5	0.0391431	0.0142221	0.00599358	1433	0.0451408
EUR	ccn5	0.00926935	0.00207664	8.08e-06	47665	0.000116704
EUR	cd14	0.0114884	0.00209323	4.08e-08	46700	8.46e-07
EUR	cd163	0.0141525	0.00226683	4.32e-10	47843	1.23e-08
EUR	cd1c	-0.00415363	0.00122379	0.000689195	47776	0.00691796
EUR	cd200	-0.00391197	0.00132173	0.00308057	47548	0.0256437
EUR	cd207	0.0135333	0.00198411	9.16e-12	46603	3.5e-10
EUR	cd209	-0.00693225	0.00196525	0.000420046	47789	0.00443148
EUR	cd22	0.00934044	0.0021303	1.16e-05	48127	0.00016344
EUR	cd27	0.00944866	0.00207809	5.46e-06	47763	8.09e-05
EUR	cd274	0.00596622	0.0016798	0.000383073	47221	0.00408332
EUR	cd300c	0.0101757	0.00177074	9.16e-09	48073	2.11e-07
EUR	cd300e	0.0175796	0.00215856	3.91e-16	47882	2.57e-14
EUR	cd302	0.00949002	0.00155385	1.02e-09	47389	2.76e-08
EUR	cd34	-0.00395694	0.00124453	0.00147642	47927	0.0134579
EUR	cd4	0.0108363	0.00144132	5.65e-14	47420	2.92e-12
EUR	cd46	0.00755064	0.00142896	1.27e-07	47352	2.46e-06
EUR	cd48	0.00588231	0.00151681	0.000105426	47767	0.00126166
EUR	cd5	0.0144551	0.00174899	1.43e-16	47953	9.76e-15
EUR	cd59	0.00930247	0.00112841	1.71e-16	45868	1.15e-14
EUR	cd6	0.0152077	0.00274928	3.19e-08	48103	6.74e-07
EUR	cd63	0.00981526	0.00264923	0.000211673	47218	0.0023505
EUR	cd70	0.0108536	0.00217666	6.17e-07	47560	1.09e-05
EUR	cd74	0.00770416	0.00180326	1.94e-05	48066	0.000263134
SAS	cd74	0.0391714	0.0129542	0.00256163	985	0.0217642
EUR	cd79b	0.00856145	0.00223975	0.000132266	48124	0.00154495
EUR	cd83	0.0169528	0.00178417	2.16e-21	47557	2.87e-19
EUR	cd8a	0.0153476	0.00252952	1.31e-09	48048	3.5e-08
AFR	cd93	0.0322778	0.011452	0.00489423	1377	0.0381881
EUR	cd99l2	0.0117834	0.00125986	8.88e-21	47642	1.13e-18
EUR	cdc27	0.0109246	0.00311548	0.000454375	46489	0.00477379
EUR	cdcp1	0.0226544	0.00266705	2.05e-17	47278	1.6e-15
EUR	cdh1	0.00694694	0.00181121	0.000125463	45879	0.00147952
EUR	cdh2	0.0137089	0.0018661	2.07e-13	47670	9.85e-12
SAS	cdh2	0.0464444	0.0137932	0.000789524	974	0.00783101
EUR	cdhr2	0.0262745	0.00406583	1.04e-10	47443	3.31e-09
EUR	cdhr5	0.0140699	0.00203412	4.67e-12	47665	1.82e-10
EUR	cdkn1a	0.022012	0.00549492	6.19e-05	47443	0.000770475
EUR	cdnf	0.00476458	0.00161463	0.00317026	47412	0.0262039
EUR	ceacam1	0.00316783	0.00102847	0.00207014	47716	0.0180797
EUR	ceacam5	0.0221265	0.00340935	8.67e-11	45891	2.77e-09
EUR	ceacam8	0.0121861	0.00251074	1.22e-06	46723	2.06e-05
EUR	cep20	0.0157179	0.00383222	4.11e-05	46506	0.000528812
EUR	cep43	0.0112051	0.00359335	0.00182009	46420	0.0161137
EUR	cep85	0.0111301	0.00332431	0.000814341	46508	0.00804987
EUR	ces1	0.0389293	0.00438542	7.1e-19	47792	6.7e-17
EUR	ces2	0.0206288	0.00284642	4.32e-13	47406	1.89e-11
EUR	cetn2	0.0104884	0.00347328	0.00253128	46511	0.0215934
EUR	cfc1	0.00669261	0.00222964	0.00268658	46370	0.022654
AFR	cgref1	0.0501265	0.0167116	0.00275188	1418	0.0231713
EUR	cgref1	0.0102833	0.00218168	2.44e-06	47678	3.9e-05
EUR	chgb	-0.00786376	0.00210079	0.000181872	47903	0.00205466
EUR	chi3l1	0.0290932	0.00405307	7.18e-13	46606	3.07e-11
EUR	chrdl1	0.00720419	0.00161779	8.48e-06	47785	0.000121979
EUR	ckap4	0.00941858	0.00136254	4.82e-12	47875	1.87e-10
EUR	clec14a	0.0067436	0.00161327	2.92e-05	47645	0.000385622
EUR	clec1b	0.0179281	0.00493294	0.000278949	48084	0.00304554
EUR	clec4a	-0.00840176	0.00177293	2.15e-06	47572	3.49e-05
EUR	clec4d	0.0204865	0.00322289	2.08e-10	47582	6.28e-09
EUR	clec5a	0.0068395	0.00150213	5.3e-06	47493	7.89e-05
EUR	clec6a	0.0153433	0.00238656	1.3e-10	46492	4.04e-09
EUR	clec7a	0.0131037	0.00237463	3.44e-08	47833	7.25e-07
EUR	clmp	0.00986388	0.00115689	1.56e-17	48038	1.26e-15
EUR	clpp	0.0154561	0.0049231	0.00169332	47221	0.0151519
EUR	clul1	-0.00798906	0.00229751	0.000507007	47551	0.00526999
EUR	cnst	0.0181003	0.00561094	0.00125664	47690	0.0118039
EUR	cntn1	-0.00826245	0.00139614	3.28e-09	48255	8.1e-08
EUR	cntn2	-0.00710634	0.00230166	0.00201972	48059	0.0176937
EUR	cntn3	0.00700007	0.00170427	4.01e-05	47668	0.00051668
EUR	cntn4	-0.00438652	0.00122161	0.000330029	47644	0.00357654
EUR	cntn5	-0.0160593	0.00191724	5.61e-17	47756	4e-15
EUR	col18a1	0.0109405	0.00121321	1.99e-19	47867	2.03e-17
EUR	col4a1	-0.00715959	0.00206813	0.000536919	47668	0.00554541
EUR	col6a3	0.0170291	0.00187024	8.92e-20	48202	9.67e-18
EUR	colec12	0.0134945	0.00140296	6.99e-22	47605	9.97e-20
EUR	comt	0.0126238	0.00435452	0.00374521	46286	0.0303158
EUR	cox5b	0.0130626	0.00353576	0.000220634	47413	0.00244537
EUR	cpm	0.02521	0.00190794	8.65e-40	47839	1.01e-36
EUR	cpvl	-0.0120902	0.00207873	6.06e-09	47949	1.45e-07
EUR	creg1	0.0140603	0.00197451	1.09e-12	47020	4.55e-11
EUR	creld2	0.0172095	0.00266699	1.11e-10	47785	3.49e-09
EUR	crhbp	0.00994835	0.00146907	1.29e-11	47630	4.73e-10
EUR	crim1	0.00332044	0.00102663	0.00122015	47840	0.0114981
EUR	crip2	0.0123867	0.00186171	2.9e-11	47236	1e-09
SAS	crip2	0.0355708	0.0126645	0.0050751	973	0.039285
EUR	crisp2	-0.0147447	0.00294857	5.73e-07	48040	1.01e-05
EUR	crkl	0.0152293	0.00549169	0.00555379	47729	0.042596
EUR	csf1	0.00909598	0.00142947	1.99e-10	47864	6.05e-09
EUR	cst3	0.0131482	0.00149366	1.38e-18	47734	1.26e-16
EUR	cst5	-0.0085369	0.00282813	0.00254115	46757	0.021646
SAS	cst5	0.0591972	0.0210388	0.00499827	965	0.0387929
EUR	cst7	0.0209292	0.00422583	7.34e-07	47347	1.28e-05
EUR	cstb	0.0190549	0.00226529	4.15e-17	47001	3.04e-15
EUR	ctf1	0.013419	0.004266	0.00165873	46755	0.0148878
EUR	ctsb	-0.0107061	0.00274854	9.83e-05	47725	0.00118312
EUR	ctsd	0.0163811	0.00206842	2.44e-15	44464	1.44e-13
EAS	ctsf	0.0916372	0.0320793	0.00469075	235	0.0367966
EUR	ctsh	0.012881	0.00376783	0.00062977	46643	0.00640941
EUR	ctsl	0.00684021	0.0012315	2.8e-08	47658	5.96e-07
AFR	ctso	0.0285543	0.010386	0.00604735	1440	0.0454873
EUR	ctso	0.0126347	0.0015704	8.78e-16	48134	5.59e-14
EUR	ctss	0.00733807	0.00128641	1.18e-08	37420	2.67e-07
EUR	ctsz	0.012028	0.00164777	2.93e-13	47688	1.35e-11
AFR	cxadr	0.051158	0.0172093	0.00300205	1422	0.0250613
EUR	cxadr	0.0207361	0.00259276	1.3e-15	47549	7.9e-14
EUR	cxcl16	0.00919494	0.00121544	3.94e-14	48167	2.08e-12
EUR	cxcl17	0.0318823	0.0025301	2.37e-36	48171	1.98e-33
EUR	cxcl5	0.0204894	0.00585836	0.000470124	47529	0.00492158
EUR	dab2	0.0170783	0.00574367	0.00294663	48061	0.024669
EUR	dag1	0.0088262	0.00245888	0.000331621	47876	0.00358715
EUR	dbi	0.0160941	0.00406736	7.6e-05	47446	0.000938779
EUR	dbnl	0.0132659	0.00479221	0.00563853	47876	0.0430766
EUR	dcbld2	0.0103213	0.00177693	6.34e-09	47803	1.52e-07
EUR	dcxr	0.00797229	0.00282711	0.00480516	47804	0.0375431
EUR	ddah1	0.0151124	0.00227352	3.02e-11	47389	1.04e-09
EUR	ddc	-0.011397	0.00248561	4.55e-06	47597	6.87e-05
EUR	decr1	0.0178831	0.00494123	0.000295874	47589	0.00321234
EUR	defa1_defa1b	0.0112521	0.0025797	1.29e-05	46573	0.000179285
EUR	defb4a_defb4b	0.051134	0.00767014	2.65e-11	46995	9.33e-10
EUR	dffa	0.00959062	0.00348055	0.00586262	48186	0.044383
EUR	dkk1	0.00973994	0.00304506	0.00138182	48082	0.0127345
EUR	dll1	0.00844894	0.00152542	3.06e-08	47779	6.49e-07
EUR	dnaja2	0.0117148	0.00425101	0.00585762	48038	0.044383
EUR	dnajb1	0.0130815	0.00453098	0.00388961	47443	0.0311808
EUR	dner	-0.00528624	0.00133552	7.56e-05	47545	0.000935772
EUR	dnmbp	0.0138266	0.00320605	1.62e-05	47258	0.000221014
EUR	dok2	0.0225516	0.00632674	0.000364918	47690	0.00391117
EUR	dpp6	-0.0104364	0.00176854	3.63e-09	47439	8.94e-08
EUR	dpp7	0.0142421	0.0030861	3.94e-06	47292	6.04e-05
EUR	dpt	0.00731697	0.00141904	2.53e-07	48235	4.7e-06
EUR	dpy30	0.0218772	0.00309318	1.54e-12	47828	6.3e-11
EUR	dsc2	0.00846202	0.00173776	1.12e-06	47109	1.9e-05
EUR	dsg2	-0.00598288	0.00138561	1.58e-05	47662	0.000216355
EUR	ebag9	0.018449	0.0048994	0.000166382	47298	0.0018943
SAS	ebi3_il27	0.0344276	0.0114228	0.00264543	988	0.0223715
EUR	eda2r	0.0105266	0.00188815	2.49e-08	48015	5.33e-07
EUR	edil3	0.00886479	0.0018576	1.83e-06	46755	3e-05
EUR	efemp1	0.0086684	0.00162218	9.15e-08	47768	1.82e-06
AFR	efna1	0.0316162	0.00912619	0.000547378	1431	0.00561974
EUR	efna1	0.0108621	0.0014134	1.56e-14	47513	8.6e-13
EUR	efna4	0.0131603	0.00152425	6.11e-18	47113	5.11e-16
EUR	egfr	-0.00382378	0.00083398	4.55e-06	48249	6.87e-05
EUR	egln1	0.0132713	0.00249178	1.01e-07	47318	1.98e-06
EUR	eif4g1	0.0149595	0.00517293	0.00383111	48189	0.0307962
EUR	eloa	0.00698731	0.00244069	0.00420039	47182	0.0333523
EUR	enpp5	-0.0122569	0.0020026	9.4e-10	47751	2.57e-08
EUR	enpp7	0.0328999	0.00452549	3.65e-13	46204	1.65e-11
EUR	epcam	0.0206358	0.00500126	3.7e-05	47640	0.000478466
EUR	epha1	0.0128776	0.00176547	3.05e-13	47802	1.4e-11
EUR	epha2	0.00813184	0.00154862	1.52e-07	45857	2.91e-06
EUR	ephb4	0.00574244	0.0012359	3.39e-06	48203	5.27e-05
EAS	ephx2	0.163707	0.0479852	0.000767822	235	0.00764165
EUR	eps8l2	0.00591196	0.00155979	0.00015069	47937	0.00173249
EUR	erbb2	0.00953304	0.00130416	2.72e-13	47792	1.26e-11
EUR	erbb3	0.00533417	0.000989195	6.98e-08	47453	1.41e-06
EUR	erbin	0.0170056	0.00530141	0.00133863	47443	0.0123755
EUR	ereg	0.0127655	0.00408597	0.00178374	47201	0.0158159
EUR	erp44	0.00781072	0.00134595	6.55e-09	47359	1.55e-07
EUR	esam	0.00509971	0.00160428	0.00147971	48240	0.013467
EUR	esm1	-0.0114818	0.00180378	1.97e-10	47631	5.99e-09
EUR	ezr	0.00736564	0.00124272	3.11e-09	48017	7.73e-08
EUR	f11r	0.0130431	0.00290886	7.35e-06	47666	0.00010754
EUR	f7	0.0142479	0.00159227	3.74e-19	47767	3.59e-17
EUR	f9	0.010718	0.000977333	5.97e-28	47745	1.52e-25
EUR	fabp1	0.0433372	0.00505784	1.08e-17	47635	8.91e-16
SAS	fabp1	0.0976634	0.0345127	0.0047542	983	0.0371946
EUR	fabp2	0.0143064	0.00406704	0.000435799	47676	0.00458686
EUR	fabp4	0.0423166	0.00319358	5.27e-40	48253	9.96e-37
EUR	fabp5	0.0218316	0.00357152	9.87e-10	47908	2.69e-08
EUR	fam3b	0.00675398	0.00176961	0.000135441	47433	0.00157643
EUR	fam3c	0.00820268	0.00151282	5.92e-08	47580	1.21e-06
SAS	fam3c	0.0302153	0.0106088	0.00449141	975	0.0353724
EUR	fap	-0.00484599	0.00140046	0.000540058	48258	0.00556412
EUR	fas	0.00649262	0.00141968	4.81e-06	47908	7.2e-05
EUR	faslg	-0.0159111	0.00189857	5.41e-17	48164	3.91e-15
EUR	fbp1	0.0183563	0.00379286	1.3e-06	47654	2.2e-05
EUR	fcar	0.0137478	0.00246207	2.37e-08	47585	5.11e-07
EUR	fcgr2b	0.00934519	0.00290386	0.0012909	46479	0.0120101
EUR	fcn2	0.0115526	0.00207361	2.54e-08	47424	5.43e-07
EUR	fetub	0.0146822	0.00168305	2.78e-18	47753	2.5e-16
EUR	fgf21	0.0784608	0.00643599	3.9e-34	47990	2.08e-31
EUR	fgf23	0.00867622	0.00265253	0.00107271	47760	0.0102574
SAS	fgfbp1	-0.0372214	0.0120538	0.00207305	981	0.0180797
EUR	fgfr2	0.0109193	0.00114088	1.11e-21	47770	1.54e-19
EUR	fkbp4	0.0081225	0.00227143	0.000349319	47297	0.00375774
EUR	fli1	0.0196821	0.00570249	0.000558	46527	0.00571877
EUR	flt4	0.00864164	0.00176344	9.59e-07	47806	1.64e-05
EUR	fmnl1	0.00950497	0.00277587	0.000617276	46247	0.00630419
EUR	folr1	0.0060944	0.00144985	2.63e-05	47535	0.000351031
EUR	folr2	0.00702748	0.00151788	3.67e-06	48066	5.67e-05
EUR	foxo1	0.0126587	0.00440359	0.00404669	47587	0.0321756
EUR	frzb	0.00374178	0.00129998	0.00399961	47118	0.0318879
EUR	fst	0.0115882	0.00258868	7.61e-06	47789	0.000110715
EUR	fstl3	0.0171065	0.00171735	2.38e-23	47514	4.35e-21
SAS	fstl3	0.0428622	0.0115842	0.000227729	979	0.00251923
EUR	furin	0.0188471	0.00189975	3.56e-23	47807	5.95e-21
EUR	fus	0.00665321	0.00195097	0.000649691	46316	0.00658924
EUR	fut3_fut5	0.0100806	0.00232954	1.51e-05	48075	0.000208264
EUR	fxn	0.0117598	0.00375891	0.00175793	48060	0.0156789
EUR	fyb1	0.017457	0.0047608	0.000245847	47589	0.00270431
EUR	gal	-0.00974242	0.00338327	0.0039837	47876	0.0318044
EUR	galnt10	0.00541336	0.00142326	0.000142853	47424	0.0016554
EUR	galnt2	-0.00418849	0.00131883	0.00149462	48047	0.0135815
EUR	gdf15	0.0269618	0.00223444	1.77e-33	48202	8.65e-31
SAS	gdf15	0.0830344	0.0185605	8.59e-06	987	0.000123266
EUR	gfer	0.0177791	0.00336047	1.22e-07	46527	2.38e-06
EUR	gfra1	0.0136022	0.00147813	3.64e-20	47962	4.33e-18
EUR	ggh	0.0187683	0.00181758	5.72e-25	46818	1.2e-22
EUR	ggt1	0.0229163	0.00262912	2.96e-18	47546	2.63e-16
EUR	gkn1	0.00383425	0.00136418	0.00494602	45552	0.0384384
EUR	glb1	0.0116123	0.00215555	7.19e-08	47288	1.45e-06
EUR	glo1	0.0112167	0.00306447	0.000252257	46802	0.00276443
EUR	gne	0.012566	0.00331674	0.00015165	46485	0.00173942
EUR	golm2	0.0106543	0.0011649	6.13e-20	48030	6.9e-18
EUR	gopc	0.0151396	0.00523042	0.00379899	47589	0.0306222
EUR	gp1ba	0.00614098	0.00165613	0.000209116	47438	0.00232652
EUR	gp2	-0.0246465	0.00434459	1.41e-08	46152	3.15e-07
EUR	gpa33	0.0330873	0.00696538	2.04e-06	47443	3.31e-05
EUR	gpc5	-0.00808068	0.0028747	0.00494143	47295	0.0384384
EUR	gpkow	0.00522403	0.00122535	2.02e-05	46274	0.000272831
EUR	gpr37	0.0183293	0.00343833	9.82e-08	46800	1.94e-06
EUR	grap2	0.0203391	0.00661344	0.00210325	47690	0.0182886
EUR	grn	0.00626206	0.0012301	3.58e-07	47386	6.51e-06
EUR	grpel1	0.0181471	0.0030404	2.41e-09	47367	6.13e-08
EUR	gsta1	0.0303834	0.00464639	6.25e-11	47609	2.09e-09
EUR	gsta3	0.0252214	0.00413404	1.06e-09	46504	2.85e-08
EUR	gusb	0.0362342	0.00330124	5.39e-28	47876	1.43e-25
EUR	gys1	0.0225302	0.00478177	2.46e-06	46803	3.93e-05
EUR	gzma	0.0117806	0.00176744	2.67e-11	48151	9.35e-10
EUR	gzmb	-0.0102494	0.00303195	0.000724244	47403	0.00723255
EUR	hao1	0.0308225	0.00671077	4.38e-06	48061	6.66e-05
EUR	havcr1	0.0267014	0.00322123	1.17e-16	47949	8.05e-15
EUR	havcr2	0.0180492	0.00182259	4.25e-23	47625	6.91e-21
EUR	hbq1	-0.0111348	0.00315278	0.000413192	48059	0.00437252
EUR	hdgf	0.015573	0.00483153	0.00126852	47991	0.0118964
EUR	hexim1	0.0176702	0.00425129	3.24e-05	47589	0.000422055
EUR	hgf	0.0216963	0.00193448	3.72e-29	48167	1.32e-26
EUR	hla_e	-0.00532545	0.00144497	0.000228502	47515	0.00252301
EUR	hmox2	0.00655773	0.00221821	0.00311489	46347	0.0258558
EUR	hnmt	0.0177792	0.00253474	2.34e-12	47057	9.53e-11
EUR	hnrnpk	0.0127495	0.00404477	0.00162205	46645	0.0146261
EUR	hpgds	-0.00824703	0.00185036	8.33e-06	46448	0.00012009
SAS	hpgds	-0.0378658	0.0129187	0.00345967	952	0.0283161
EUR	hs3st3b1	0.0131432	0.00192967	9.8e-12	47425	3.72e-10
EUR	hspa1a	0.0117059	0.00371269	0.00161735	47799	0.0146261
EUR	hspb6	0.00651189	0.00201081	0.00120263	48043	0.0113513
AFR	hspg2	0.0249987	0.00891081	0.00509399	1421	0.0393792
EUR	hspg2	0.00826673	0.00134628	8.29e-10	47213	2.29e-08
EUR	htra2	0.0103092	0.0031622	0.00111432	47811	0.0105999
EUR	hyal1	0.0103423	0.00115483	3.5e-19	47376	3.41e-17
EUR	hyou1	0.00581115	0.00113352	2.96e-07	48253	5.43e-06
EUR	ica1	0.0135971	0.00412188	0.000971821	46776	0.00933842
EUR	icam1	0.0132059	0.00151552	3.03e-18	47431	2.65e-16
EUR	icam3	0.00385003	0.00129471	0.00294416	48213	0.024669
EUR	icam5	0.015015	0.00236693	2.26e-10	47686	6.76e-09
EUR	idua	0.0155642	0.00238638	7e-11	48054	2.28e-09
EUR	ifngr2	0.0106805	0.00267757	6.65e-05	47298	0.000824421
EUR	ifnlr1	0.00894601	0.00171271	1.76e-07	47389	3.33e-06
EUR	igf2r	0.005087	0.00120532	2.44e-05	47635	0.000327826
EUR	igfbp1	-0.0230808	0.00680444	0.000694356	48186	0.00695783
EUR	igfbp2	-0.0174651	0.00351517	6.77e-07	48188	1.18e-05
EUR	igfbp4	0.0226993	0.00219956	6.09e-25	46967	1.23e-22
EUR	igfbp6	0.00695878	0.00149702	3.35e-06	47386	5.23e-05
EUR	igfbp7	0.00557293	0.00147878	0.000164357	48161	0.00187489
EUR	igfbpl1	0.00722704	0.00173475	3.1e-05	47650	0.000407398
EUR	igsf3	0.0112804	0.00179783	3.54e-10	47341	1.02e-08
EUR	igsf8	0.0132657	0.00155885	1.79e-17	47659	1.42e-15
EUR	ikbkg	0.0137925	0.00478116	0.00391896	47589	0.0313731
EUR	il10rb	0.0105522	0.00149149	1.52e-12	47860	6.25e-11
EUR	il12rb1	0.00679984	0.00190014	0.000345782	46740	0.00373342
EUR	il13ra1	0.00455075	0.00115696	8.39e-05	47045	0.00102914
EUR	il15	0.00836201	0.00164977	4.02e-07	47519	7.22e-06
EUR	il16	0.0113235	0.00206157	3.98e-08	47993	8.29e-07
EUR	il17c	0.0128833	0.00349849	0.000231192	46680	0.0025479
EUR	il17rb	-0.0146373	0.00279394	1.62e-07	46983	3.08e-06
EUR	il18	0.0141471	0.00236349	2.17e-09	47448	5.62e-08
EUR	il18bp	0.00709254	0.00156311	5.71e-06	47824	8.43e-05
EUR	il18r1	0.0181626	0.00177886	1.89e-24	48181	3.57e-22
SAS	il1r1	0.0373346	0.00899955	3.64e-05	979	0.000472542
EUR	il1r2	0.00472567	0.00100574	2.63e-06	47549	4.16e-05
EUR	il1rap	-0.0115855	0.00233111	6.72e-07	47669	1.17e-05
EUR	il1rl2	0.00593743	0.00201125	0.00315772	46772	0.0261372
EUR	il1rn	0.0376261	0.00308523	3.69e-34	47492	2.08e-31
EUR	il2ra	0.0106499	0.00208527	3.28e-07	47306	6e-06
SAS	il2ra	0.038689	0.0139075	0.00551001	976	0.0424271
EUR	il4r	0.00849972	0.00180176	2.4e-06	47521	3.84e-05
EUR	il6	0.0341969	0.00376347	1.06e-19	47320	1.11e-17
EUR	il7r	-0.0106683	0.0027767	0.000122152	47669	0.00144411
EUR	inhbc	0.0224146	0.00232524	5.69e-22	47665	8.33e-20
EUR	inppl1	0.0194494	0.00508553	0.000131231	47443	0.00153592
EUR	ipcef1	0.0179662	0.00464059	0.000108297	47218	0.00128812
EUR	iqgap2	0.0103732	0.00278231	0.00019304	47396	0.00217244
EUR	irak1	0.010885	0.00361635	0.00261443	46772	0.0221413
EUR	irak4	0.0151595	0.0053665	0.00473224	47589	0.0370724
EUR	ism1	0.0139543	0.00202312	5.36e-12	47575	2.06e-10
EUR	itga11	-0.014659	0.00176179	8.99e-17	47548	6.34e-15
EUR	itga5	0.0113275	0.00134573	3.95e-17	47658	2.93e-15
EUR	itgam	-0.00879197	0.00161556	5.29e-08	47653	1.09e-06
EUR	itgav	-0.00597567	0.000860829	3.92e-12	48056	1.56e-10
EUR	itgb1	-0.0032844	0.00107046	0.00215462	47570	0.0186521
EUR	itgb7	-0.00950312	0.00233685	4.78e-05	48031	0.000605134
EUR	jam2	0.0038176	0.0013102	0.00357289	48013	0.0291611
EUR	kdr	0.00579674	0.00131406	1.03e-05	47800	0.000145896
EUR	kel	-0.0057202	0.00186058	0.0021104	46528	0.0183194
EUR	kifbp	0.0143134	0.00425217	0.000762865	47438	0.00760526
EUR	kir2dl3	-0.0175634	0.00396417	9.42e-06	46526	0.000133821
EUR	kit	-0.00528053	0.00152682	0.000543658	47773	0.00559136
EUR	kitlg	-0.00752415	0.0019233	9.16e-05	47674	0.00111705
EUR	klk10	0.0105281	0.00201533	1.76e-07	47625	3.33e-06
EUR	klk11	0.00709528	0.00147659	1.55e-06	47274	2.59e-05
EUR	klk13	0.013567	0.00230436	3.95e-09	46607	9.62e-08
EUR	klk8	0.00952016	0.00182816	1.92e-07	46054	3.62e-06
EUR	krt18	0.0295582	0.00436988	1.36e-11	47417	4.93e-10
EUR	krt19	0.00930931	0.0034271	0.00660243	47472	0.0490946
EUR	kynu	0.0172874	0.00239075	4.87e-13	48186	2.11e-11
EUR	lair1	0.0170561	0.00190241	3.2e-19	47602	3.17e-17
SAS	lair1	0.0395902	0.0138597	0.00437517	981	0.0345993
EUR	lama4	0.00613787	0.00171582	0.0003476	47868	0.00374615
EUR	lamp2	0.0059064	0.00100373	4.02e-09	46150	9.76e-08
EUR	lamp3	0.0324172	0.0028911	3.84e-29	48107	1.32e-26
EUR	lat	0.0118462	0.00390909	0.00244349	48187	0.0208749
EUR	lat2	0.0270892	0.00645805	2.74e-05	47443	0.000362502
EUR	layn	0.00568247	0.00170074	0.000834875	47150	0.00821125
EUR	lbp	0.0144239	0.00301584	1.73e-06	47831	2.86e-05
EUR	lbr	0.0110522	0.00335209	0.00097759	47928	0.00937845
EUR	lcn2	0.0109283	0.00192481	1.37e-08	46139	3.08e-07
EUR	ldlr	0.0278832	0.00284839	1.32e-22	47799	2.03e-20
EUR	lep	0.0647604	0.00505906	1.87e-37	47690	1.82e-34
EUR	lepr	-0.0066726	0.00161353	3.55e-05	47646	0.000461597
EUR	lgals1	0.0154524	0.00182699	2.8e-17	47641	2.13e-15
EUR	lgals3	0.014135	0.00153333	3.13e-20	47788	3.82e-18
EUR	lgals4	0.0259228	0.0028313	5.6e-20	47626	6.43e-18
EUR	lgals7_lgals7b	0.0133498	0.00205404	8.15e-11	47428	2.62e-09
EUR	lgals8	0.0140942	0.00312908	6.68e-06	48081	9.84e-05
EUR	lgals9	0.0183095	0.00174878	1.27e-25	47635	2.75e-23
EUR	lgmn	0.0105384	0.00186892	1.72e-08	47872	3.8e-07
EUR	lif	0.0084682	0.00232537	0.00027118	46323	0.00296625
EUR	lilra2	0.0084738	0.00181425	3.01e-06	47640	4.75e-05
EUR	lilra5	0.0166251	0.00172195	4.91e-22	47613	7.37e-20
EUR	lilrb1	0.00757422	0.00140826	7.55e-08	48248	1.51e-06
EUR	lilrb2	0.01058	0.00177583	2.58e-09	48026	6.5e-08
EUR	lilrb4	0.0167808	0.0023027	3.21e-13	46764	1.46e-11
EUR	lpcat2	0.00562264	0.00158562	0.000391484	47119	0.00416539
EUR	lpl	-0.00937158	0.00240062	9.48e-05	47672	0.00114772
EUR	lrig1	0.00831691	0.00176945	2.61e-06	47904	4.14e-05
EUR	lrp11	0.0137658	0.00184797	9.55e-14	47673	4.78e-12
SAS	lrp11	0.0423847	0.0137962	0.00218478	974	0.0188596
EUR	lrpap1	0.0126741	0.00290481	1.28e-05	48048	0.000178595
EUR	lrrc25	0.0134448	0.00198205	1.19e-11	47391	4.43e-10
EUR	lrrn1	-0.0129236	0.00204219	2.5e-10	46773	7.39e-09
EUR	lsp1	0.0080319	0.00211642	0.000147798	47558	0.00170259
EUR	lta4h	0.0184843	0.00308405	2.07e-09	48043	5.38e-08
EUR	ltbp3	0.0161783	0.00263298	8.09e-10	46400	2.24e-08
EUR	ltbr	0.00600201	0.00142494	2.53e-05	47354	0.000339416
EUR	ly6d	0.00777026	0.00186071	2.97e-05	47331	0.000390892
SAS	ly6d	0.0422427	0.0130719	0.00127316	971	0.0119209
EUR	ly96	0.00953989	0.00176718	6.76e-08	47203	1.37e-06
EUR	lyn	0.0126888	0.00437697	0.00374545	47443	0.0303158
EUR	mad1l1	0.0136934	0.00222203	7.22e-10	46889	2.01e-08
EUR	manf	0.0173095	0.00617406	0.00505583	47876	0.0391877
EUR	mapk9	0.00693484	0.00220008	0.00162207	47553	0.0146261
EUR	marco	0.0062752	0.00136259	4.13e-06	47680	6.29e-05
EUR	matn2	0.00464924	0.00151736	0.00218503	47703	0.0188596
EUR	max	0.0176585	0.00541709	0.00111578	46536	0.0105999
EUR	mcam	-0.00930396	0.00168857	3.61e-08	47829	7.57e-07
EUR	mcfd2	0.00868649	0.00226855	0.000128782	47458	0.00151331
EUR	mdk	0.00947842	0.00252456	0.000173906	47590	0.00196847
EUR	megf10	-0.0102815	0.00203992	4.67e-07	47638	8.36e-06
EUR	megf9	0.00634175	0.00106113	2.3e-09	48100	5.92e-08
EUR	mep1b	-0.0188046	0.0060489	0.00187984	47690	0.0166175
EUR	mertk	0.00745703	0.00128636	6.79e-09	48162	1.6e-07
EUR	mesd	0.0171855	0.00626814	0.00611398	47669	0.0458705
EUR	met	-0.00348086	0.00103809	0.000799616	47788	0.00791768
EUR	metap1d	0.0146549	0.00423346	0.000537294	47587	0.00554541
EUR	mfap5	0.0104512	0.00220583	2.16e-06	48254	3.5e-05
EUR	mfge8	0.0112192	0.00224679	5.95e-07	47661	1.05e-05
EUR	micb_mica	-0.0521436	0.00752876	4.39e-12	47589	1.73e-10
EUR	mitd1	0.0137389	0.00501965	0.00620229	47298	0.0464141
EUR	mme	0.0186947	0.00420144	8.62e-06	47443	0.000123384
SAS	mme	0.085166	0.0288333	0.00321669	966	0.0265502
EUR	mmp1	0.0133445	0.00469651	0.00449402	45931	0.0353724
SAS	mmp10	0.0635539	0.0217918	0.0036227	980	0.0295265
EUR	mmp12	0.0168522	0.00280777	1.96e-09	47676	5.15e-08
EUR	mmp7	0.0184902	0.00250314	1.53e-13	46690	7.46e-12
EUR	mmp8	0.0202617	0.00372885	5.54e-08	47925	1.14e-06
EUR	mmp9	0.0162973	0.00320018	3.54e-07	47590	6.46e-06
EUR	mpi	0.0138709	0.0044151	0.00168071	47443	0.0150621
EUR	mpo	0.0108032	0.00235833	4.64e-06	47552	6.97e-05
EUR	msln	0.0309298	0.00310888	2.69e-23	47371	4.63e-21
SAS	msln	0.0695577	0.0204006	0.00067794	965	0.00684018
EUR	msmb	0.0149156	0.00363818	4.14e-05	47571	0.000531653
EUR	msr1	0.0135057	0.00235795	1.02e-08	48059	2.35e-07
EUR	msra	0.0103706	0.00373935	0.00555024	47811	0.042596
EUR	muc13	0.00808321	0.00258523	0.00176895	46495	0.0157214
SAS	muc13	0.0688741	0.0202061	0.000680845	951	0.00685116
EUR	mvk	0.0283153	0.004162	1.03e-11	46767	3.88e-10
EUR	myoc	-0.00817777	0.00233614	0.000464711	47662	0.00487364
EUR	mzb1	0.014691	0.00269631	5.1e-08	47780	1.06e-06
EUR	nbl1	0.0060927	0.001362	7.72e-06	47785	0.000112071
EUR	ncam1	-0.008109	0.0015677	2.32e-07	47832	4.32e-06
EUR	ncam2	-0.0101182	0.00142507	1.26e-12	47661	5.24e-11
EUR	ncan	-0.00793559	0.00202813	9.14e-05	48077	0.00111628
EUR	nck2	0.0157397	0.00545045	0.00388146	47876	0.0311582
EUR	ncs1	0.00583199	0.00145483	6.11e-05	48057	0.000762924
EUR	nectin2	0.0118641	0.00149523	2.16e-15	47571	1.29e-13
EUR	nectin4	0.00732726	0.00151734	1.38e-06	47692	2.31e-05
EUR	nell2	-0.00483831	0.00144901	0.00084129	47832	0.00826045
EUR	nfasc	0.00566998	0.00145194	9.43e-05	48181	0.00114504
EUR	nfatc1	0.0179923	0.00508128	0.000399151	47589	0.00423926
EUR	nfkbie	0.0102722	0.00250808	4.22e-05	46465	0.000540017
EUR	nid1	0.00708325	0.00195401	0.000289288	47687	0.00314668
EUR	nomo1	0.00996113	0.00125036	1.67e-15	47650	1.01e-13
EUR	nos3	0.0149863	0.00254433	3.89e-09	46383	9.52e-08
EUR	notch3	-0.0100825	0.00174571	7.72e-09	48254	1.8e-07
EUR	npdc1	0.00992208	0.00155579	1.82e-10	47590	5.62e-09
EUR	nppc	0.00719296	0.00239405	0.00266143	47540	0.0224743
EUR	nptxr	-0.00802003	0.00175629	4.97e-06	47646	7.42e-05
EUR	npy	0.0105496	0.00340495	0.00194732	48061	0.017085
EUR	nrp2	0.00534089	0.00143388	0.000195701	47613	0.0021945
EUR	nt5e	0.0116649	0.00285532	4.41e-05	47767	0.000562065
EUR	ntf3	-0.00490886	0.00176902	0.005524	47529	0.0424789
EAS	ntprobnp	-0.194464	0.0699367	0.00589023	237	0.0445344
EUR	ntrk3	-0.0123034	0.00116942	7.38e-26	48079	1.66e-23
EUR	nucb2	0.0117012	0.00193841	1.59e-09	47982	4.2e-08
EUR	nudt5	0.00915428	0.00262567	0.000489907	47653	0.0051104
EUR	odam	-0.0124331	0.00252015	8.11e-07	46281	1.4e-05
EUR	ogfr	0.00529982	0.00168346	0.001644	47398	0.0147865
EUR	ogn	0.0110059	0.00216762	3.84e-07	47639	6.94e-06
EUR	olr1	0.0129507	0.00298972	1.48e-05	47128	0.000204588
EUR	omd	-0.0150337	0.00225413	2.6e-11	47852	9.21e-10
EUR	omg	-0.0150067	0.00349112	1.72e-05	47439	0.000234452
EUR	oscar	0.0112542	0.00174466	1.12e-10	47707	3.52e-09
EUR	osm	0.0232304	0.00380503	1.03e-09	47367	2.79e-08
EUR	osmr	0.00449678	0.00102493	1.15e-05	47921	0.000161725
EUR	oxt	0.0519333	0.00767376	1.32e-11	48084	4.84e-10
EUR	p4hb	0.0147981	0.00202394	2.68e-13	47408	1.26e-11
EUR	pag1	0.022581	0.00285738	2.79e-15	46710	1.6e-13
EUR	pak4	0.00931422	0.0030465	0.0022343	46449	0.0192281
EUR	pam	0.00618235	0.00142018	1.34e-05	47979	0.000185982
EUR	pamr1	0.0147437	0.00149816	7.87e-23	47661	1.24e-20
EUR	parp1	0.00758382	0.00242439	0.00176026	47302	0.0156789
EUR	pbld	0.0103442	0.0026552	9.8e-05	46512	0.00118249
EUR	pcsk9	0.0161693	0.00204269	2.51e-15	48256	1.47e-13
EUR	pdgfb	0.0121484	0.00441906	0.0059782	47874	0.045083
EUR	pdgfc	0.00634427	0.00141867	7.77e-06	46454	0.000112525
EUR	pgf	0.00633304	0.001281	7.69e-07	48137	1.33e-05
EUR	pglyrp1	0.0105533	0.00213575	7.79e-07	47954	1.34e-05
EUR	phospho1	0.00568298	0.00150015	0.000151888	47227	0.00173942
AFR	pi3	0.0590669	0.0184654	0.00141085	1421	0.0129409
EUR	pi3	0.0201587	0.00273848	1.85e-13	46964	8.95e-12
EUR	pigr	0.0239262	0.00200137	6.83e-33	47045	2.86e-30
EUR	pik3ip1	0.00767637	0.00134338	1.11e-08	47567	2.52e-07
EUR	pilra	0.0124596	0.0021862	1.21e-08	47666	2.73e-07
EUR	pilrb	0.0158631	0.00296856	9.15e-08	47690	1.82e-06
EUR	pla2g15	0.0102524	0.0013861	1.42e-13	47791	6.98e-12
EUR	pla2g1b	-0.00894949	0.00217638	3.93e-05	48137	0.000507321
EUR	pla2g2a	0.0108965	0.00261764	3.15e-05	47395	0.000411504
EUR	plat	0.027601	0.00277313	2.58e-23	48101	4.57e-21
EUR	plaur	0.0163127	0.00150803	3.07e-27	47311	7.48e-25
EUR	plin1	0.0112102	0.00178247	3.22e-10	46397	9.33e-09
EUR	plin3	0.00991885	0.00220241	6.7e-06	47650	9.84e-05
EUR	pltp	-0.0151552	0.00189339	1.23e-15	48107	7.65e-14
EUR	plxdc1	-0.0040468	0.00147022	0.00591634	46302	0.0446741
EUR	plxnb2	0.0076662	0.00121793	3.11e-10	48003	9.06e-09
EUR	podxl2	-0.00394737	0.00142729	0.00568314	47780	0.0433044
EUR	polr2f	0.0104014	0.00152842	1.02e-11	47176	3.85e-10
EUR	pon2	0.0104095	0.0018031	7.83e-09	46788	1.82e-07
EUR	pon3	-0.0128426	0.00148656	5.84e-18	47835	4.95e-16
EUR	ppib	0.018206	0.00490653	0.000207026	47734	0.00230765
EUR	ppp1r12a	0.0179796	0.00495006	0.000281314	47812	0.00306564
EUR	ppp1r2	0.0138084	0.00412939	0.00082662	47688	0.00815747
EUR	ppp1r9b	0.0168757	0.00495079	0.000653275	48189	0.00661413
EUR	ppp3r1	0.00959802	0.00214087	7.37e-06	47288	0.00010754
EUR	ppy	-0.0160418	0.00528571	0.0024071	47587	0.0205941
EUR	prcp	0.0140902	0.00165502	1.73e-17	47934	1.39e-15
EUR	prdx3	0.0126533	0.00369216	0.000610633	46763	0.00624724
EUR	prdx6	-0.0104922	0.00308264	0.000665504	48007	0.0067263
EUR	prkab1	0.00757022	0.00274325	0.00578976	46709	0.0440158
EUR	prkra	0.0154657	0.00348207	8.95e-06	46513	0.000127785
AFR	prl	-0.0777591	0.0286307	0.0066887	1442	0.049673
EUR	proc	0.00779794	0.00130838	2.54e-09	47754	6.43e-08
EUR	prok1	0.00946526	0.00313832	0.00256247	47585	0.0217642
EUR	prss2	0.00872435	0.00262189	0.000876918	47780	0.00855233
EUR	prss8	0.0295976	0.00223693	6.81e-40	47488	9.96e-37
SAS	prss8	0.0456068	0.01427	0.00143896	976	0.0131575
EUR	prtg	-0.00603476	0.0012483	1.34e-06	48025	2.25e-05
EUR	prtn3	0.00990045	0.00233572	2.25e-05	46367	0.000303721
EAS	psg1	-0.145581	0.051553	0.00516997	239	0.0399138
EUR	psip1	0.0145887	0.00298896	1.06e-06	47337	1.8e-05
EUR	pspn	0.0148277	0.00501985	0.00314019	47588	0.0260289
EUR	psrc1	0.00876562	0.00300506	0.00353639	46459	0.0289036
EUR	ptgds	0.00632514	0.00146876	1.66e-05	47197	0.000226759
EUR	ptn	0.0120733	0.00253378	1.89e-06	46769	3.09e-05
EUR	ptpn1	0.012721	0.00409422	0.00189066	47294	0.0166629
EUR	pts	0.0122067	0.00290799	2.7e-05	46269	0.000358583
SAS	pts	0.0720272	0.0215638	0.000870581	942	0.00851933
EUR	pvr	0.0115122	0.00186066	6.17e-10	48053	1.74e-08
EUR	qdpr	0.00721519	0.00224562	0.00131442	47462	0.0122095
EUR	qpct	0.00799625	0.00134329	2.66e-09	47696	6.67e-08
EUR	rab6a	-0.0146287	0.00235101	4.94e-10	47498	1.4e-08
EUR	rarres2	0.0323936	0.00257705	3.52e-36	47900	2.57e-33
EUR	rassf2	0.00850654	0.00257474	0.000954406	46259	0.00923171
EUR	rbp2	0.0166651	0.00400146	3.12e-05	47440	0.000408769
EUR	rbp5	0.022374	0.00308181	3.93e-13	47430	1.73e-11
SAS	reg1b	0.0553332	0.0193314	0.00429507	990	0.0340118
EUR	reg4	0.00887978	0.00251747	0.000420279	47709	0.00443148
EUR	relt	0.00728578	0.00145252	5.3e-07	47609	9.42e-06
EUR	ren	0.0230603	0.00387912	2.79e-09	47648	6.97e-08
EUR	ret	0.00695937	0.00208286	0.000834619	47438	0.00821125
EUR	retn	0.00942388	0.00210196	7.36e-06	47515	0.00010754
EUR	rgma	-0.00905134	0.00161794	2.23e-08	48080	4.83e-07
EUR	rnase3	0.0162719	0.00553599	0.00329125	47336	0.0270891
EUR	rnaset2	0.00448628	0.00134993	0.000890152	47997	0.00865311
EUR	robo1	0.00424679	0.00122488	0.000526558	47655	0.00545384
EUR	robo2	0.00325415	0.00117595	0.00565534	48063	0.0431487
EUR	rp2	0.00685559	0.0021293	0.00128439	47397	0.0119876
EUR	rrm2	0.0103569	0.00224232	3.87e-06	46297	5.94e-05
EUR	rtn4r	0.0139377	0.00183946	3.6e-14	48019	1.91e-12
EUR	s100a11	0.00601812	0.00217273	0.00561055	47042	0.0429189
EUR	scamp3	0.0201279	0.00442442	5.4e-06	47443	8.02e-05
EUR	scara5	0.00739607	0.00153999	1.57e-06	48050	2.61e-05
EUR	scarb2	0.0124308	0.00157567	3.11e-15	46293	1.75e-13
EUR	scarf1	0.00955788	0.00216826	1.05e-05	48258	0.000147728
EUR	scarf2	-0.00395211	0.0014322	0.00579155	48055	0.0440158
EUR	scgb1a1	-0.0183011	0.00288111	2.14e-10	47706	6.43e-09
EUR	scly	0.0167654	0.00252383	3.11e-11	47909	1.06e-09
EUR	sele	0.0151434	0.00270408	2.15e-08	48264	4.7e-07
EUR	selp	0.011202	0.00292595	0.000129094	47852	0.00151394
EUR	selplg	0.00599492	0.00129978	3.99e-06	47555	6.1e-05
EUR	sema3f	0.00883584	0.00141884	4.78e-10	47683	1.36e-08
EUR	septin9	0.00417764	0.00136992	0.00229308	47280	0.0196761
EUR	serpinb8	0.0147865	0.00264264	2.21e-08	47907	4.82e-07
EUR	serpine1	0.0152563	0.00348628	1.21e-05	48263	0.000169103
EUR	setmar	0.00700455	0.0015134	3.7e-06	47020	5.69e-05
EUR	sfrp1	0.0173752	0.00219528	2.53e-15	47069	1.47e-13
EUR	sftpa2	0.0139809	0.00269164	2.06e-07	46479	3.86e-06
EUR	sftpd	0.0101843	0.00343726	0.00304897	47690	0.0254167
EUR	sh2b3	0.0146958	0.00507498	0.00378454	46527	0.0305478
EUR	shmt1	0.0238314	0.00445338	8.77e-08	47798	1.75e-06
EUR	siae	0.012796	0.00240171	9.98e-08	47727	1.97e-06
EUR	siglec1	0.0114993	0.00218006	1.33e-07	47838	2.58e-06
EUR	siglec10	0.00815341	0.00171069	1.88e-06	47536	3.08e-05
EUR	siglec7	0.011594	0.00146832	2.94e-15	47671	1.67e-13
EUR	sirpb1	0.00891873	0.00237369	0.000171942	47562	0.0019538
EUR	sit1	0.0267485	0.00296662	2.01e-19	46774	2.03e-17
EUR	skap1	0.0233162	0.00385579	1.49e-09	47213	3.95e-08
EUR	slamf6	0.00765979	0.00188106	4.67e-05	46462	0.000592534
EUR	slamf7	0.00885861	0.00299599	0.00310983	47572	0.0258505
EUR	slamf8	0.0135606	0.00277515	1.03e-06	46511	1.76e-05
EUR	slc27a4	0.00882038	0.00304925	0.00382196	46277	0.0307649
EUR	slc39a5	0.010524	0.00259498	5.01e-05	47506	0.000633288
EUR	smad1	0.0167202	0.00428333	9.49e-05	46526	0.00114772
EUR	smad5	0.00594697	0.00103245	8.46e-09	47384	1.96e-07
EUR	smoc1	0.0111808	0.00171955	8e-11	48046	2.59e-09
EUR	smoc2	0.00920708	0.00196435	2.78e-06	47841	4.39e-05
EUR	smpd1	0.0156511	0.00253197	6.41e-10	47830	1.79e-08
EUR	snap23	0.0171125	0.00448375	0.0001355	47685	0.00157643
EUR	snap29	0.0173743	0.00468001	0.000205499	47806	0.002295
EUR	sncg	0.0241635	0.00362614	2.7e-11	47293	9.4e-10
EUR	snx9	0.010938	0.00354514	0.00203424	47684	0.0177943
EUR	sod2	0.00970806	0.0018683	2.04e-07	47592	3.83e-06
EUR	sorcs2	0.00717466	0.0017848	5.83e-05	46486	0.000730824
EUR	sord	0.0120025	0.00353306	0.000681369	47807	0.00685116
EUR	spink1	0.00794542	0.00208978	0.000143693	47557	0.00166184
EUR	spink4	0.00909397	0.00329884	0.00584063	47575	0.0443312
SAS	spink4	0.0818737	0.0248074	0.00100081	982	0.00958545
EUR	spink6	0.0196935	0.00281031	2.46e-12	48061	9.91e-11
EUR	spint1	0.00806749	0.00126536	1.84e-10	47434	5.66e-09
EUR	spint2	0.00819699	0.00203688	5.72e-05	47787	0.000720318
EUR	spon1	0.00581418	0.00164604	0.000412476	47676	0.00437252
EUR	spon2	0.0133562	0.00181539	1.91e-13	47447	9.15e-12
SAS	spon2	0.0423504	0.0130281	0.00119122	974	0.0112617
AFR	spp1	0.0491888	0.0175777	0.00520528	1443	0.0401335
EUR	spry2	0.0134798	0.00474448	0.00449711	46759	0.0353724
EUR	srpk2	0.0175062	0.00435444	5.82e-05	47579	0.000730824
EUR	ssc4d	0.0432796	0.00640719	1.45e-11	47617	5.22e-10
EUR	ssc5d	0.0231595	0.0022521	8.87e-25	47849	1.73e-22
EUR	st6gal1	0.0112873	0.00151006	7.87e-14	48244	4e-12
EUR	stc1	0.0128019	0.00226064	1.5e-08	48040	3.33e-07
EUR	stk24	0.00917251	0.00318059	0.00392955	46526	0.0314149
EUR	stk4	0.012251	0.0044693	0.00612497	47690	0.0458942
EUR	stx4	0.0108828	0.00280843	0.000106739	47211	0.00127476
EUR	stx8	0.00964742	0.00248297	0.000102282	47520	0.00122654
EUR	sult2a1	0.00918535	0.00275913	0.000872023	47440	0.00851933
EUR	sumf2	0.0163942	0.00267477	8.9e-10	48052	2.45e-08
EUR	tacstd2	-0.00498548	0.00157639	0.00156478	42208	0.0141971
EUR	tafa5	0.0147831	0.00182456	5.52e-16	47388	3.55e-14
EUR	tank	0.0102304	0.0036066	0.00456192	46761	0.035834
EUR	tarbp2	0.0133062	0.00413405	0.00128866	46536	0.0120083
EUR	tbcb	0.01407	0.00517205	0.00652285	47298	0.0486264
EUR	tcn2	0.00400346	0.00146333	0.00622395	48105	0.0465167
EUR	tff1	0.0297801	0.00398813	8.33e-14	47435	4.2e-12
SAS	tff1	0.100241	0.031974	0.00177041	972	0.0157214
EUR	tff2	0.0230303	0.00299959	1.65e-14	47766	9.02e-13
EUR	tff3	0.0111347	0.00198142	1.93e-08	47303	4.22e-07
EUR	tfpi	0.00707812	0.00154462	4.61e-06	47467	6.93e-05
EUR	tfpi2	0.00818651	0.00175898	3.26e-06	47575	5.12e-05
EUR	tgfa	0.0220643	0.00242149	8.41e-20	47557	9.28e-18
EUR	tgfb1	0.0111235	0.00196572	1.53e-08	48089	3.4e-07
EUR	tgfbi	0.0066185	0.00137617	1.52e-06	47365	2.54e-05
EUR	tgfbr2	0.0123635	0.00165354	7.73e-14	47707	3.97e-12
EUR	thbd	0.00453468	0.00143643	0.00159555	47658	0.0144538
EUR	thbs2	0.00973234	0.00184746	1.39e-07	47563	2.67e-06
EUR	thbs4	0.00773409	0.00242071	0.0013994	47693	0.012856
EUR	thop1	0.00660081	0.00161202	4.23e-05	47421	0.000540887
EUR	thpo	0.00645576	0.00197752	0.0010971	46788	0.0104564
EUR	thy1	0.00908466	0.00150739	1.69e-09	48056	4.44e-08
EUR	tia1	0.0183586	0.0062613	0.00336878	46271	0.0276495
EUR	tigar	0.00914402	0.00232527	8.42e-05	46342	0.0010309
EUR	timd4	0.00841716	0.00225498	0.000189659	47847	0.0021385
EUR	timp1	0.00950487	0.00145675	6.88e-11	47107	2.28e-09
EUR	timp3	0.0255934	0.00676071	0.000153525	47874	0.00175475
EUR	timp4	0.00769594	0.00201794	0.000137038	47615	0.00159116
EUR	tjap1	0.012558	0.00432975	0.00372863	47811	0.0302635
EUR	tmsb10	0.0230872	0.00396755	5.96e-09	47669	1.44e-07
EUR	tnf	0.0113455	0.00170026	2.54e-11	46581	9.06e-10
EUR	tnfrsf10a	0.0191914	0.0017136	4.47e-29	47274	1.45e-26
AFR	tnfrsf10b	0.0291642	0.00988661	0.00323191	1413	0.0266382
EUR	tnfrsf10b	0.019874	0.00166207	6.63e-33	47205	2.86e-30
EUR	tnfrsf10c	0.0161025	0.00255126	2.79e-10	47802	8.15e-09
EUR	tnfrsf11a	0.0175205	0.0020233	4.89e-18	48142	4.21e-16
EUR	tnfrsf11b	0.00659057	0.0015018	1.14e-05	47624	0.000161338
EUR	tnfrsf12a	0.0129767	0.00181973	1.01e-12	47771	4.25e-11
EUR	tnfrsf13b	0.00775363	0.00161598	1.61e-06	47612	2.66e-05
EUR	tnfrsf14	0.0117281	0.00155343	4.44e-14	47675	2.32e-12
EUR	tnfrsf1a	0.014696	0.00155438	3.39e-21	47596	4.4e-19
EUR	tnfrsf1b	0.0149252	0.00176399	2.72e-17	47610	2.1e-15
EUR	tnfrsf4	0.00588614	0.00191479	0.00211305	48052	0.0183194
EUR	tnfrsf6b	0.0168529	0.0028469	3.25e-09	47204	8.05e-08
EUR	tnfrsf9	0.0102273	0.00201008	3.63e-07	47203	6.58e-06
EUR	tnfsf11	-0.0162769	0.00316211	2.65e-07	47580	4.89e-06
EUR	tnfsf12	-0.00427366	0.00147585	0.00378446	48185	0.0305478
EUR	tnfsf13	0.00458533	0.00136514	0.000783242	47860	0.00778188
EUR	tnfsf13b	0.0113281	0.00139363	4.45e-16	48117	2.89e-14
SAS	tnfsf13b	0.0444615	0.0105224	2.61e-05	985	0.000348683
EUR	tnfsf14	0.0133444	0.0030051	8.99e-06	47291	0.000128033
EUR	tnr	-0.0131377	0.00219859	2.31e-09	47274	5.93e-08
EUR	tp53	0.00837299	0.00218322	0.000125653	46475	0.00147952
EUR	tpp1	0.0153232	0.00219208	2.78e-12	47126	1.11e-10
AFR	tppp3	0.0327261	0.0116223	0.00493484	1396	0.0384384
EUR	traf2	0.0100486	0.00369104	0.00648265	47584	0.0483883
EUR	trem2	0.0312746	0.00273295	2.78e-30	47629	1.08e-27
SAS	trem2	0.0606661	0.020391	0.0030012	983	0.0250613
EUR	triap1	0.0129972	0.00323978	6.04e-05	48056	0.000754812
EUR	trim5	0.0135984	0.00444683	0.00222948	47588	0.0192149
EUR	tshb	-0.0117505	0.00385042	0.0022764	47610	0.0195617
EUR	txlna	0.0188205	0.00462003	4.64e-05	47298	0.000589664
EUR	txndc5	0.0137188	0.00351063	9.33e-05	48083	0.00113472
EUR	txnrd1	0.00691829	0.00240665	0.00404643	47666	0.0321756
EUR	tymp	0.0117141	0.00343448	0.000648426	47390	0.00658783
EUR	tyro3	0.00478996	0.00147023	0.00112288	47688	0.0106501
EUR	ulbp2	0.00944351	0.00189849	6.57e-07	47263	1.15e-05
EUR	umod	-0.0160423	0.00280146	1.03e-08	48095	2.36e-07
EUR	uso1	0.0149636	0.00466047	0.00132478	47443	0.0122862
EUR	usp8	0.0168039	0.00495645	0.000698714	46803	0.00698953
EUR	uxs1	0.00802258	0.00250737	0.00137711	46393	0.0127112
EUR	vegfa	0.0162751	0.00299745	5.67e-08	48033	1.16e-06
EUR	vegfd	-0.00631003	0.00184484	0.000625883	48089	0.00638095
EUR	vmo1	0.0107682	0.00337442	0.00141821	47340	0.012988
EUR	vnn2	0.013786	0.00237394	6.39e-09	47423	1.52e-07
EUR	vps53	0.0127596	0.00400822	0.00145674	47443	0.0132993
EUR	vsig4	0.0188413	0.00213469	1.12e-18	47543	1.04e-16
EUR	vsir	0.0104275	0.00315663	0.000956045	47604	0.0092323
SAS	vstm2l	0.0581433	0.019959	0.00366279	956	0.0298118
EUR	vwa1	0.0125257	0.00224627	2.47e-08	47981	5.32e-07
EUR	vwc2	0.0164468	0.00205518	1.25e-15	47141	7.67e-14
EUR	vwf	0.0152751	0.00377729	5.26e-05	48259	0.000663926
AFR	was	-0.0811784	0.0232862	0.000505413	1397	0.00526277
EUR	wasf1	0.0141482	0.00486962	0.00366948	46803	0.0298247
EUR	wfdc12	0.0177914	0.00330395	7.28e-08	47972	1.46e-06
EUR	wfdc2	0.0193555	0.00210366	3.7e-20	45164	4.33e-18
EUR	wfikkn2	-0.0119984	0.00183963	7e-11	47712	2.28e-09
EUR	xcl1	0.00992843	0.00261595	0.000147622	47899	0.00170259
EUR	xg	0.00725786	0.00156488	3.53e-06	47961	5.46e-05
EUR	yes1	0.0247716	0.00590016	2.69e-05	47443	0.000358067
EUR	ythdf3	0.0145369	0.00435515	0.00084488	46765	0.00828181
EUR	zbtb16	0.0106385	0.00373793	0.00442768	46521	0.0349674
EUR	zbtb17	0.0074449	0.00188853	8.09e-05	46540	0.000996289

## Sheet: S. Table 3
exposure	pop	SNP	chr.exposure	pos.exposure	effect_allele.exposure	other_allele.exposure	effect_allele.outcome	other_allele.outcome	beta.exposure	beta.outcome	eaf.outcome	se.exposure	se.outcome	pval.exposure	pval.outcome	mr-beta	mr-se	mr-pvalue	Q stat	Qpvalue
CACNA1C	AFR	rs769087	12	2344644	A	G	A	G	-0.698177	0.0121	0.4806	0.0629139	0.0111	6.1e-20	0.2761	-0.0173309	0.0158986	0.275673	0.0061413	0.937537
	EAS	rs769087	12	2344644	A	G	A	G	-0.698177	0.0027	0.0594	0.0629139	0.0264	6.1e-20	0.9196	-0.00386722	0.0378128	0.91854	0.151329	0.697269
	EUR	rs769087	12	2344644	A	G	A	G	-0.698177	0.0126	0.3338	0.0629139	0.0046	6.1e-20	0.00601	-0.018047	0.00658859	0.00616019	0.00646512	0.935914
	SAS	rs769087	12	2344644	A	G	A	G	-0.698177	0.046	0.2311	0.0629139	0.029	6.1e-20	0.1123	-0.0658859	0.0415368	0.112692	1.29725	0.254716
	Combined															-0.0185768	0.00594736	0.00089347	1.46119	0.691257
CACNA2D1	AFR	rs1990071	7	81823590	C	T	C	T	0.196055	0.0043	0.1317	0.0329047	0.0186	5.97e-09	0.8191	0.0219326	0.0948715	0.817173	0.73451	0.391425
	EAS	rs1990071	7	81823590	C	T	C	T	0.196055	-0.0313	0.1879	0.0329047	0.0173	5.97e-09	0.07024	-0.159649	0.0882407	0.0704124	1.29133	0.255803
	EUR	rs1990071	7	81823590	C	T	C	T	0.196055	-0.0107	0.3861	0.0329047	0.0045	5.97e-09	0.01721	-0.0545766	0.0229528	0.0174173	0.0437149	0.834385
	SAS	rs1990071	7	81823590	C	T	C	T	0.196055	-0.0333	0.3453	0.0329047	0.0284	5.97e-09	0.2421	-0.169851	0.144857	0.240982	0.581628	0.445675
	Combined															-0.0593756	0.0213915	0.00275446	2.65118	0.448587
DRD2	AFR	rs4479021	11	113383394	A	G	A	G	-0.337215	-0.0291	0.4443	0.0489313	0.0114	2.87e-11	0.01054	0.0862951	0.0338063	0.0106913	0.236534	0.626721
	EAS	rs4479021	11	113383394	A	G	A	G	-0.337215	-0.0047	0.1031	0.0489313	0.0207	2.87e-11	0.8186	0.0139377	0.0613852	0.820382	0.829739	0.362348
	EUR	rs4479021	11	113383394	A	G	A	G	-0.337215	-0.0238	0.4327	0.0489313	0.0043	2.87e-11	4.31e-08	0.0705781	0.0127515	3.11e-08	0.00322954	0.954681
	SAS	rs4479021	11	113383394	A	G	A	G	-0.337215	-0.0149	0.3015	0.0489313	0.027	2.87e-11	0.5812	0.0441855	0.0800676	0.58105	0.102771	0.748529
	Combined															0.0698535	0.0115885	8.31e-10	1.17227	0.759662
ESR2	AFR	rs928554	14	64694195	C	T	C	T	0.352894	0.0031	0.1232	0.0365661	0.0174	8.46e-20	0.8601	0.00878452	0.0493066	0.858597	1.19443	0.274438
	EAS	rs928554	14	64694195	C	T	C	T	0.352894	-0.0136	0.3378	0.0365661	0.0128	8.46e-20	0.2884	-0.0385385	0.0362716	0.288009	0.0327514	0.856388
	EUR	rs928554	14	64694195	C	T	C	T	0.352894	-0.0172	0.4369	0.0365661	0.0043	8.46e-20	7.35e-05	-0.0487399	0.012185	6.33e-05	0.0891009	0.765323
	SAS	rs928554	14	64694195	C	T	C	T	0.352894	-0.0204	0.4993	0.0365661	0.0244	8.46e-20	0.403	-0.0578078	0.0691427	0.403118	0.0337647	0.854208
	Combined															-0.0451027	0.0111003	2.42e-05	1.35005	0.717285
HTR1D	AFR	rs7532266	1	23551623	A	C	A	C	-0.274709	-0.0022	0.4367	0.0378189	0.0119	2.17e-12	0.856	0.00800846	0.0433185	0.853328	0.687643	0.406967
	EAS	rs7532266	1	23551623	A	C	A	C	-0.274709	0.0092	0.2672	0.0378189	0.0147	2.17e-12	0.5345	-0.0334899	0.0535111	0.531413	2.09323	0.147953
	EUR	rs7532266	1	23551623	A	C	A	C	-0.274709	-0.017	0.3068	0.0378189	0.0047	2.17e-12	0.0002814	0.0618836	0.017109	0.000298013	1.10117	0.29401
	SAS	rs7532266	1	23551623	A	C	A	C	-0.274709	0.0318	0.2757	0.0378189	0.0282	2.17e-12	0.2585	-0.115759	0.102654	0.259464	2.4199	0.119803
	Combined															0.04393	0.0150871	0.00179696	6.30194	0.0978093
HTR2A	AFR	rs34289177	13	47921149	T	G	T	G	0.285428	-0.0152	0.092	0.0476464	0.0215	5.45e-09	0.479	-0.0532534	0.0753255	0.479581	1.69246	0.193276
	EAS	rs34289177	13	47921149	T	G	T	G	0.285428	0.0145	0.2473	0.0476464	0.0155	5.45e-09	0.3477	0.0508009	0.0543044	0.349539	0.012452	0.91115
	EUR	rs34289177	13	47921149	T	G	T	G	0.285428	0.0138	0.3565	0.0476464	0.0045	5.45e-09	0.002272	0.0483485	0.0157658	0.0021646	0.052352	0.81902
	SAS	rs34289177	13	47921149	T	G	T	G	0.285428	0.0152	0.232	0.0476464	0.0314	5.45e-09	0.6289	0.0532534	0.11001	0.628332	0.00598714	0.938324
	Combined															0.0447412	0.0147104	0.00117718	1.76326	0.622963

## Sheet: S. Table 4
Ancestry	AUC_Type	AUC	Lower_CI	Upper_CI
All Ancestry	Reverse MR Prediction	0.522624	0.504967	0.54028
All Ancestry	Observational Prediction	0.623928	0.596375	0.651482
SAS	Reverse MR Prediction	0.578125	0.398512	0.757738
SAS	Observational Prediction	0.788333	0.404976	1
EUR	Reverse MR Prediction	0.521427	0.50349	0.539363
EUR	Observational Prediction	0.627914	0.600265	0.655563
AFR	Reverse MR Prediction	0.637566	0.490415	0.784718
AFR	Observational Prediction	0.582969	0.333381	0.832558
EAS	Reverse MR Prediction	0.765766	0.603934	0.927598
EAS	Observational Prediction	0.729885	0.480755	0.979015

## Sheet: S. Table 5 
Drugs identified as potentially effective for repurposing in major depressive disorder (adopted from Fabbri et al ., 2020)
Mechanism of action	Target	Example drugs
5α-reductase isozymes inhibition and xanthine oxidase inhibition	SRD5A1	Glycosides of the flavone class (flavonoids, e.g.apigenin, vitexin, 4’-methoxyflavone), anthrarobin
	SRD5A2
	CFTR
Acetylcholine receptor M3 antagonism	CHRM3	Diphenidol, diphemanil methylsulfate, 4-DAMP
Activation of peroxisome proliferator-activated receptor gamma and alpha Inhibition of protein synthesis	PPARA	Papaverine, PBF-999
	PPARG
Alpha-2 and beta-2 adrenergic receptors antagonism	ADRA2A	Idazoxan, todralazine
	ADRB2
Calcium channels modulation and anatagonism	CACNA2D1	Fendiline, dihydropyridine derivatives (e.g.nitrendipine), pregabalin, gabapentin,calmidazolium
	CACNA1C
	CACNA1H
Catechol-O-methyltransferase (COMT) inhibition	COMT	Entacapone
Dopamine receptor modulation	DRD2	Gepirone, sulpiride, bromocriptine, quinagolide
Estrogen receptor modulation	ESR1	Tibolone, 4-hydroxyestrone, levonorgestrel
	ESR2
GABA-A receptor modulation	GABRA1	Brexanolone, primidone, meprobamate
	GABRA6
	GABRG3
Glutamate ionotropic receptor AMPA type 1 antagonism	GRIA1	Farampator (terminated for cardiac toxicity),dasolampanel
Glutamate ionotropic receptor NMDA antagonism and partial agonism	GRIN1	Arcaine, ifenprodil, cycloserine
	GRIN2B
Histamine H1, H3, H4 receptor antagonsim	HRH1	Thioperamide, clemastine
	HRH3
	HRH4
Inhibition of protein synthesis	MAPK14	Doxycycline
	ABCB1
	MAPK8
	MMP1
	MMP7
	MMP13
	MMP8
	NOS2
	MPO
	TH
Modulation of sterol biosynthesis	F2R	Ketoconazole
	ABCG2
	CYP3A43
	KCNA10
	VDR
Phosphodiesterase inhibitor	PDE10A	Papaverine, PBF-999
Serotonin receptor 1D modulation	HTR1D	Vortioxetine, elzasonan (discontinued), bufotenine,GSK163090
Serotonin receptor 2A and 2C antagonism	HTR2A	Pizotifen, cyproheptadine
	HTR2C
Cyclooxygenase inhibition	COX1	Piroxicam
	COX2
Mitochondrial carnitine palmitoyltransferase-1 inhibition	CPT1C	Perhexiline
Histone deacetylase inhibition	HDAC	Scriptaid, CP-690334-01, vorinostat
Mitogen-activated protein kinase phosphatase-1 inhibitor	MKP1(DUSP1)	Sanguinarine

## Sheet: S. Table 6
Cis-eQTL instrumental variants for actionable proteins derived in GTEx
ensembl_gene_id	uniprot	gene name	tissue	chr	pos	effect_allele	other_allele	beta	se	pvalue
ENSG00000133019	P20309	CHRM3	Lung	1	239450832	A	G	0.3266	0.0531	2.05e-09
ENSG00000133019	P20309	CHRM3	Thyroid	1	239450832	A	G	0.3691	0.0461	1.1e-14
ENSG00000162733	Q16832	DRD2	Esophagus_Muscularis	1	162766476	C	T	-0.2559	0.0421	3.31e-09
ENSG00000179546	P28221	HTR1D	Brain_Anterior_cingulate_cortex_BA24	1	23524727	C	T	-0.5499	0.0938	4.8e-08
ENSG00000179546	P28221	HTR1D	Brain_Cortex	1	23550794	G	A	-0.535	0.0751	4.85e-11
ENSG00000179546	P28221	HTR1D	Brain_Frontal_Cortex_BA9	1	23294839	G	A	0.6527	0.0972	7.03e-10
ENSG00000179546	P28221	HTR1D	Brain_Nucleus_accumbens_basal_ganglia	1	23550794	G	A	-0.2776	0.0393	6.64e-11
ENSG00000179546	P28221	HTR1D	Brain_Putamen_basal_ganglia	1	23511763	G	A	-0.277	0.0428	2.55e-09
ENSG00000179546	P28221	HTR1D	Nerve_Tibial	1	23551623	A	C	-0.2747	0.0378	2.17e-12
ENSG00000277893	P31213	SRD5A2	Lung	2	32460348	A	G	-0.1485	0.0266	4.39e-08
ENSG00000132170	P37231	PPARG	Brain_Cerebellar_Hemisphere	3	12345971	A	C	1.7912	0.1283	1.13e-26
ENSG00000132170	P37231	PPARG	Brain_Cerebellum	3	12351306	C	A	1.4258	0.103	1.79e-28
ENSG00000196639	P35367	HRH1	Nerve_Tibial	3	11122348	T	C	-0.1434	0.0224	4.8e-10
ENSG00000145545	P18405	SRD5A1	Brain_Anterior_cingulate_cortex_BA24	5	6671309	G	A	-0.2371	0.0373	5.01e-09
ENSG00000145545	P18405	SRD5A1	Cells_Cultured_fibroblasts	5	6659517	T	C	-0.1612	0.027	6.09e-09
ENSG00000145545	P18405	SRD5A1	Colon_Transverse	5	6669762	C	T	0.156	0.0258	5.49e-09
ENSG00000145545	P18405	SRD5A1	Esophagus_Mucosa	5	6632320	A	C	0.2419	0.0421	1.91e-08
ENSG00000145545	P18405	SRD5A1	Lung	5	6632320	A	C	0.2434	0.0392	1.43e-09
ENSG00000145545	P18405	SRD5A1	Skin_Not_Sun_Exposed_Suprapubic	5	6635882	G	T	0.1934	0.0264	1.55e-12
ENSG00000145545	P18405	SRD5A1	Skin_Sun_Exposed_Lower_leg	5	6671309	G	A	0.1825	0.0288	5.83e-10
ENSG00000145545	P18405	SRD5A1	Whole_Blood	5	6660400	A	C	0.5293	0.0369	2.09e-39
ENSG00000169252	P07550	ADRB2	Cells_Cultured_fibroblasts	5	148346260	A	C	0.2292	0.0347	1.57e-10
ENSG00000169252	P07550	ADRB2	Heart_Atrial_Appendage	5	148152781	C	T	0.3814	0.0514	1.84e-12
ENSG00000145863	Q16445	GABRA6	Brain_Cerebellar_Hemisphere	5	161111261	A	C	-0.5539	0.0451	9.46e-23
ENSG00000145863	Q16445	GABRA6	Brain_Cerebellum	5	161126670	A	G	-0.5202	0.0396	1.25e-26
ENSG00000155511	P42261	GRIA1	Cells_Cultured_fibroblasts	5	152802553	T	G	-0.2149	0.0309	1.79e-11
ENSG00000155511	P42261	GRIA1	Heart_Atrial_Appendage	5	152984480	G	A	-0.4667	0.0672	3.17e-11
ENSG00000155511	P42261	GRIA1	Nerve_Tibial	5	152955075	G	A	0.4427	0.0721	2.13e-09
ENSG00000155511	P42261	GRIA1	Nerve_Tibial	5	152900686	T	G	-0.4114	0.051	9.65e-15
ENSG00000155511	P42261	GRIA1	Thyroid	5	152934711	C	T	-0.2886	0.0425	3.95e-11
ENSG00000181104	P25116	F2R	Adipose_Subcutaneous	5	76038885	A	G	-0.4634	0.0293	1.75e-44
ENSG00000181104	P25116	F2R	Adipose_Visceral_Omentum	5	76045257	G	A	-0.3783	0.0319	2.53e-27
ENSG00000181104	P25116	F2R	Adrenal_Gland	5	76035067	A	G	0.4503	0.0614	1.09e-11
ENSG00000181104	P25116	F2R	Artery_Tibial	5	75988434	C	A	0.2383	0.0354	5.66e-11
ENSG00000181104	P25116	F2R	Artery_Tibial	5	75952765	C	A	0.1882	0.0338	4.63e-08
ENSG00000181104	P25116	F2R	Breast_Mammary_Tissue	5	76037626	T	C	-0.4395	0.0479	1.28e-17
ENSG00000181104	P25116	F2R	Cells_Cultured_fibroblasts	5	75986581	G	T	-0.2809	0.0385	1.98e-12
ENSG00000181104	P25116	F2R	Colon_Sigmoid	5	76042776	C	T	-0.4001	0.0486	1.77e-14
ENSG00000181104	P25116	F2R	Esophagus_Gastroesophageal_Junction	5	76037626	T	C	-0.406	0.0445	4.27e-17
ENSG00000181104	P25116	F2R	Esophagus_Mucosa	5	76042776	C	T	-0.3462	0.0406	4.17e-16
ENSG00000181104	P25116	F2R	Esophagus_Muscularis	5	76036638	C	T	-0.4843	0.0356	1.01e-33
ENSG00000181104	P25116	F2R	Heart_Atrial_Appendage	5	76037626	T	C	-0.193	0.034	3.74e-08
ENSG00000181104	P25116	F2R	Heart_Left_Ventricle	5	76036638	C	T	-0.2267	0.0332	6.17e-11
ENSG00000181104	P25116	F2R	Lung	5	76041708	T	C	-0.8506	0.0347	1.2e-79
ENSG00000181104	P25116	F2R	Muscle_Skeletal	5	76041708	T	C	-0.6452	0.0325	6.66e-66
ENSG00000181104	P25116	F2R	Nerve_Tibial	5	76035679	G	A	-0.3473	0.0342	1.48e-21
ENSG00000181104	P25116	F2R	Pancreas	5	76037626	T	C	-0.4946	0.0517	5.13e-18
ENSG00000181104	P25116	F2R	Prostate	5	76037626	T	C	-0.4467	0.0737	1.08e-08
ENSG00000181104	P25116	F2R	Skin_Not_Sun_Exposed_Suprapubic	5	76007554	T	C	0.2023	0.034	6.33e-09
ENSG00000181104	P25116	F2R	Spleen	5	76036638	C	T	-0.3518	0.0492	3.99e-11
ENSG00000181104	P25116	F2R	Spleen	5	75953678	A	G	0.2409	0.041	2.87e-08
ENSG00000181104	P25116	F2R	Stomach	5	76037178	A	G	0.4044	0.0481	5.75e-15
ENSG00000181104	P25116	F2R	Testis	5	76041708	T	C	-0.5218	0.0466	2.37e-23
ENSG00000181104	P25116	F2R	Thyroid	5	76036638	C	T	-0.2076	0.0343	3e-09
ENSG00000181104	P25116	F2R	Whole_Blood	5	76037551	A	G	-0.1365	0.0219	1.03e-09
ENSG00000091831	P03372	ESR1	Brain_Anterior_cingulate_cortex_BA24	6	151070190	C	T	4.6394	0.7884	4.38e-08
ENSG00000091831	P03372	ESR1	Testis	6	152408886	G	A	0.2582	0.0421	3.95e-09
ENSG00000091831	P03372	ESR1	Thyroid	6	152000028	G	A	-0.1904	0.0336	2.6e-08
ENSG00000112062	Q16539	MAPK14	Artery_Tibial	6	36029540	A	C	-0.4191	0.0545	1.1e-13
ENSG00000112062	Q16539	MAPK14	Brain_Cerebellar_Hemisphere	6	36019227	A	G	-0.3127	0.0459	4.39e-10
ENSG00000112062	Q16539	MAPK14	Colon_Transverse	6	36052192	G	A	-0.3918	0.0677	2.23e-08
ENSG00000112062	Q16539	MAPK14	Heart_Left_Ventricle	6	36093330	A	G	-0.2443	0.0419	1.63e-08
ENSG00000112062	Q16539	MAPK14	Skin_Not_Sun_Exposed_Suprapubic	6	36039153	C	T	-0.3233	0.0493	1.88e-10
ENSG00000112541	Q9Y233	PDE10A	Pituitary	6	165820556	T	G	-0.3027	0.0497	6.91e-09
ENSG00000112541	Q9Y233	PDE10A	Testis	6	165820556	T	G	-0.179	0.0276	5.55e-10
ENSG00000112541	Q9Y233	PDE10A	Thyroid	6	165821351	T	C	-0.2279	0.0369	1.59e-09
ENSG00000112541	Q9Y233	PDE10A	Thyroid	6	166043862	C	T	-0.4218	0.0418	1.26e-21
ENSG00000001626	P13569	CFTR	Heart_Left_Ventricle	7	117135212	T	C	0.5497	0.0978	4.76e-08
ENSG00000153956	P54289	CACNA2D1	Cells_Cultured_fibroblasts	7	81917452	A	G	0.2624	0.0423	1.57e-09
ENSG00000153956	P54289	CACNA2D1	Esophagus_Mucosa	7	82069642	C	A	0.202	0.0305	1.28e-10
ENSG00000153956	P54289	CACNA2D1	Skin_Not_Sun_Exposed_Suprapubic	7	82072958	A	G	0.3376	0.0363	1.27e-18
ENSG00000153956	P54289	CACNA2D1	Skin_Not_Sun_Exposed_Suprapubic	7	81823590	C	T	0.1961	0.0329	5.97e-09
ENSG00000153956	P54289	CACNA2D1	Skin_Sun_Exposed_Lower_leg	7	82085692	T	C	0.2529	0.0297	2.85e-16
ENSG00000153956	P54289	CACNA2D1	Skin_Sun_Exposed_Lower_leg	7	81823590	C	T	0.1799	0.027	7.9e-11
ENSG00000153956	P54289	CACNA2D1	Stomach	7	82061407	A	C	-0.2012	0.0355	4.79e-08
ENSG00000085563	P08183	ABCB1	Testis	7	87138645	G	A	-0.6372	0.05	2.6e-28
ENSG00000150594	P08913	ADRA2A	Artery_Tibial	10	112846298	G	A	0.3005	0.042	3.88e-12
ENSG00000150594	P08913	ADRA2A	Brain_Caudate_basal_ganglia	10	112969177	G	A	0.4784	0.0668	4.93e-11
ENSG00000150594	P08913	ADRA2A	Brain_Nucleus_accumbens_basal_ganglia	10	112970294	G	A	0.4415	0.0668	7.31e-10
ENSG00000150594	P08913	ADRA2A	Esophagus_Mucosa	10	113178509	A	C	-0.2619	0.0385	4.47e-11
ENSG00000107643	P45983	MAPK8	Adipose_Subcutaneous	10	49659637	T	C	-0.2491	0.0306	4.27e-15
ENSG00000107643	P45983	MAPK8	Brain_Cerebellar_Hemisphere	10	49659637	T	C	-0.3756	0.0539	2.03e-10
ENSG00000107643	P45983	MAPK8	Brain_Cerebellum	10	49659637	T	C	-0.3556	0.056	2.46e-09
ENSG00000107643	P45983	MAPK8	Colon_Sigmoid	10	49661970	T	C	-0.2706	0.0413	4.17e-10
ENSG00000107643	P45983	MAPK8	Colon_Transverse	10	49518817	C	T	-0.2272	0.0329	4.47e-11
ENSG00000107643	P45983	MAPK8	Esophagus_Gastroesophageal_Junction	10	49594240	A	C	-0.2299	0.0356	6.79e-10
ENSG00000107643	P45983	MAPK8	Esophagus_Mucosa	10	49563290	C	T	-0.3126	0.0333	7.81e-19
ENSG00000107643	P45983	MAPK8	Esophagus_Muscularis	10	49660001	C	T	-0.2516	0.0317	3.18e-14
ENSG00000107643	P45983	MAPK8	Lung	10	49659637	T	C	-0.2167	0.0272	1.95e-14
ENSG00000107643	P45983	MAPK8	Nerve_Tibial	10	49659637	T	C	-0.2402	0.0286	8.61e-16
ENSG00000107643	P45983	MAPK8	Skin_Not_Sun_Exposed_Suprapubic	10	49519255	T	C	-0.2381	0.0275	1.65e-16
ENSG00000107643	P45983	MAPK8	Skin_Sun_Exposed_Lower_leg	10	49651052	G	A	-0.2252	0.027	8.18e-16
ENSG00000107643	P45983	MAPK8	Small_Intestine_Terminal_Ileum	10	49660001	C	T	-0.2868	0.0455	7.4e-09
ENSG00000107643	P45983	MAPK8	Spleen	10	49546345	T	C	-0.3503	0.0478	1.52e-11
ENSG00000107643	P45983	MAPK8	Thyroid	10	49659637	T	C	-0.1589	0.0216	9.72e-13
ENSG00000107643	P45983	MAPK8	Whole_Blood	10	49594240	A	C	-0.1221	0.0204	4.08e-09
ENSG00000196611	P03956	MMP1	Adipose_Visceral_Omentum	11	102675489	G	A	0.4507	0.0562	1.84e-14
ENSG00000196611	P03956	MMP1	Cells_Cultured_fibroblasts	11	102675489	G	A	0.5993	0.034	5.07e-50
ENSG00000196611	P03956	MMP1	Heart_Atrial_Appendage	11	102675489	G	A	0.657	0.061	1.73e-22
ENSG00000196611	P03956	MMP1	Heart_Left_Ventricle	11	102675489	G	A	0.4898	0.0654	1.06e-12
ENSG00000196611	P03956	MMP1	Lung	11	102675489	G	A	0.3771	0.0452	1.35e-15
ENSG00000196611	P03956	MMP1	Nerve_Tibial	11	102639592	T	G	0.3332	0.0594	3.84e-08
ENSG00000196611	P03956	MMP1	Nerve_Tibial	11	102675489	G	A	0.344	0.0583	8.27e-09
ENSG00000196611	P03956	MMP1	Pancreas	11	102663503	C	T	0.5068	0.0671	1.63e-12
ENSG00000196611	P03956	MMP1	Thyroid	11	102675489	G	A	0.4803	0.0548	4.58e-17
ENSG00000137673	P09237	MMP7	Lung	11	102401661	C	T	-0.3324	0.0412	1.02e-14
ENSG00000137673	P09237	MMP7	Pancreas	11	102401661	C	T	-0.3459	0.04	1.8e-15
ENSG00000137673	P09237	MMP7	Skin_Sun_Exposed_Lower_leg	11	102401661	C	T	-0.2175	0.0328	9.22e-11
ENSG00000137673	P09237	MMP7	Thyroid	11	102401633	A	G	0.8711	0.1074	5.53e-15
ENSG00000180176	P07101	TH	Brain_Hippocampus	11	2198259	A	G	0.4518	0.0702	3.29e-09
ENSG00000180176	P07101	TH	Skin_Not_Sun_Exposed_Suprapubic	11	2196910	A	G	0.5972	0.0466	2.55e-31
ENSG00000180176	P07101	TH	Skin_Sun_Exposed_Lower_leg	11	2194062	C	A	0.5016	0.0424	2.85e-28
ENSG00000180176	P07101	TH	Thyroid	11	2180772	T	C	-0.5168	0.0637	5.6e-15
ENSG00000151067	Q13936	CACNA1C	Artery_Tibial	12	2184560	C	T	0.2041	0.0319	4.26e-10
ENSG00000151067	Q13936	CACNA1C	Brain_Cerebellar_Hemisphere	12	2481936	T	C	0.9766	0.1158	1.02e-13
ENSG00000151067	Q13936	CACNA1C	Brain_Cerebellar_Hemisphere	12	2344644	A	G	-0.6982	0.0629	6.1e-20
ENSG00000151067	Q13936	CACNA1C	Brain_Cerebellum	12	2355806	T	C	-0.6035	0.0593	9.61e-19
ENSG00000151067	Q13936	CACNA1C	Brain_Cerebellum	12	2481936	T	C	0.8672	0.1017	1.58e-14
ENSG00000151067	Q13936	CACNA1C	Skin_Not_Sun_Exposed_Suprapubic	12	2207601	A	G	-0.2506	0.0304	2.88e-15
ENSG00000151067	Q13936	CACNA1C	Skin_Sun_Exposed_Lower_leg	12	2213238	T	C	-0.2018	0.0221	2.12e-18
ENSG00000151067	Q13936	CACNA1C	Stomach	12	2612208	G	A	-1.768	0.2894	4.7e-09
ENSG00000273079	Q13224	GRIN2B	Nerve_Tibial	12	14266144	T	G	0.185	0.0326	2.77e-08
ENSG00000273079	Q13224	GRIN2B	Nerve_Tibial	12	13899362	C	A	-0.1912	0.0332	1.77e-08
ENSG00000273079	Q13224	GRIN2B	Nerve_Tibial	12	14103589	G	A	-0.3047	0.0465	1.79e-10
ENSG00000111424	P11473	VDR	Cells_Cultured_fibroblasts	12	48312439	A	C	0.266	0.0237	3.53e-25
ENSG00000111424	P11473	VDR	Testis	12	48249860	G	A	0.3525	0.0609	2.45e-08
ENSG00000111424	P11473	VDR	Whole_Blood	12	48282900	A	G	-0.3174	0.039	3.34e-15
ENSG00000102468	P28223	HTR2A	Adipose_Subcutaneous	13	47906498	T	G	0.2295	0.0383	4.63e-09
ENSG00000102468	P28223	HTR2A	Adipose_Visceral_Omentum	13	47921149	T	G	0.2854	0.0476	5.45e-09
ENSG00000102468	P28223	HTR2A	Artery_Aorta	13	47468580	T	C	-0.2481	0.0417	8.69e-09
ENSG00000102468	P28223	HTR2A	Artery_Aorta	13	48030249	A	G	0.9799	0.1161	2.06e-15
ENSG00000102468	P28223	HTR2A	Artery_Aorta	13	47346293	G	T	-0.313	0.0472	1.9e-10
ENSG00000102468	P28223	HTR2A	Artery_Tibial	13	48042833	A	C	0.5634	0.0897	8.48e-10
ENSG00000102468	P28223	HTR2A	Artery_Tibial	13	47897716	A	C	0.3047	0.0431	6.49e-12
ENSG00000102468	P28223	HTR2A	Colon_Sigmoid	13	47906498	T	G	0.3498	0.0528	2.68e-10
ENSG00000102468	P28223	HTR2A	Esophagus_Gastroesophageal_Junction	13	47592325	T	C	4.5086	0.7134	1.39e-09
ENSG00000102468	P28223	HTR2A	Esophagus_Mucosa	13	47890031	T	C	0.2919	0.0478	2.71e-09
ENSG00000102468	P28223	HTR2A	Esophagus_Muscularis	13	47897716	A	C	0.3282	0.0523	1.1e-09
ENSG00000102468	P28223	HTR2A	Lung	13	47897716	A	C	0.4599	0.0536	2.58e-16
ENSG00000102468	P28223	HTR2A	Minor_Salivary_Gland	13	47991019	C	T	1.9344	0.2759	3.87e-10
ENSG00000102468	P28223	HTR2A	Testis	13	47476958	G	A	-0.5017	0.0497	5.79e-20
ENSG00000140009	Q92731	ESR2	Adipose_Subcutaneous	14	63933768	A	C	3.4913	0.5989	1.1e-08
ENSG00000140009	Q92731	ESR2	Esophagus_Muscularis	14	64694158	C	T	-0.5921	0.09	1.89e-10
ENSG00000140009	Q92731	ESR2	Heart_Atrial_Appendage	14	64703593	T	G	-0.404	0.0673	6.85e-09
ENSG00000140009	Q92731	ESR2	Muscle_Skeletal	14	64710150	C	A	-0.4208	0.0554	1.36e-13
ENSG00000140009	Q92731	ESR2	Nerve_Tibial	14	64774315	T	C	-0.4705	0.0613	1.4e-13
ENSG00000140009	Q92731	ESR2	Pancreas	14	64801197	C	T	-0.6754	0.11	4.45e-09
ENSG00000140009	Q92731	ESR2	Skin_Not_Sun_Exposed_Suprapubic	14	64694195	C	T	0.3529	0.0366	8.46e-20
ENSG00000140009	Q92731	ESR2	Skin_Sun_Exposed_Lower_leg	14	64694195	C	T	0.6435	0.0385	5.6e-49
ENSG00000140009	Q92731	ESR2	Thyroid	14	64780554	A	G	-0.4338	0.0714	2.73e-09
ENSG00000182256	Q99928	GABRG3	Spleen	15	27382415	A	G	-0.7356	0.0986	7.8e-12
ENSG00000182256	Q99928	GABRG3	Spleen	15	27154451	T	C	0.6968	0.0958	2.07e-11
ENSG00000196557	O95180	CACNA1H	Adipose_Visceral_Omentum	16	1238875	G	T	0.3567	0.0583	2.65e-09
ENSG00000196557	O95180	CACNA1H	Adrenal_Gland	16	1187931	T	C	-0.4314	0.0627	1.33e-10
ENSG00000196557	O95180	CACNA1H	Artery_Aorta	16	1230887	T	C	0.7291	0.1251	1.63e-08
ENSG00000196557	O95180	CACNA1H	Artery_Tibial	16	1238875	G	T	0.3393	0.0587	1.44e-08
ENSG00000196557	O95180	CACNA1H	Liver	16	1243557	T	C	-0.3854	0.0669	4.89e-08
ENSG00000196557	O95180	CACNA1H	Skin_Not_Sun_Exposed_Suprapubic	16	1252441	C	T	-0.7448	0.0451	3.34e-46
ENSG00000196557	O95180	CACNA1H	Skin_Sun_Exposed_Lower_leg	16	1252441	C	T	-0.7889	0.0458	2.17e-51
ENSG00000196557	O95180	CACNA1H	Thyroid	16	1238875	G	T	0.7985	0.0784	6.15e-22
ENSG00000196557	O95180	CACNA1H	Thyroid	16	1193841	A	G	0.2572	0.0448	1.76e-08
ENSG00000134489	Q9H3N8	HRH4	Lung	18	22041194	G	A	0.7848	0.0777	2.39e-21
ENSG00000134489	Q9H3N8	HRH4	Spleen	18	22041194	G	A	1.1391	0.106	3.81e-20
ENSG00000134489	Q9H3N8	HRH4	Whole_Blood	18	22041194	G	A	1.0829	0.0565	6.26e-62
ENSG00000186951	Q07869	PPARA	Artery_Tibial	22	46638540	G	A	-0.1768	0.0266	9.1e-11
ENSG00000093010	P21964	COMT	Adipose_Subcutaneous	22	19925166	A	G	-0.774	0.0734	3.08e-23
ENSG00000093010	P21964	COMT	Adipose_Visceral_Omentum	22	19929519	A	G	-0.8278	0.0841	3.23e-20
ENSG00000093010	P21964	COMT	Artery_Aorta	22	19925166	A	G	-0.8191	0.0818	3e-20
ENSG00000093010	P21964	COMT	Artery_Tibial	22	19925166	A	G	-0.664	0.0587	4.55e-26
ENSG00000093010	P21964	COMT	Brain_Cerebellar_Hemisphere	22	19925166	A	G	-0.7706	0.122	5.05e-09
ENSG00000093010	P21964	COMT	Brain_Cerebellum	22	19925166	A	G	-0.77	0.1057	1.78e-11
ENSG00000093010	P21964	COMT	Breast_Mammary_Tissue	22	19930810	C	T	-0.749	0.0799	3.12e-18
ENSG00000093010	P21964	COMT	Cells_Cultured_fibroblasts	22	19930810	C	T	-0.7018	0.0512	1.72e-34
ENSG00000093010	P21964	COMT	Colon_Sigmoid	22	19935148	C	T	-0.7276	0.0964	1.19e-12
ENSG00000093010	P21964	COMT	Colon_Sigmoid	22	20225276	A	C	-2.0828	0.3432	5.71e-09
ENSG00000093010	P21964	COMT	Esophagus_Gastroesophageal_Junction	22	19929519	A	G	-0.8213	0.0869	4.51e-18
ENSG00000093010	P21964	COMT	Esophagus_Mucosa	22	19949952	G	A	-0.4053	0.0247	3.04e-45
ENSG00000093010	P21964	COMT	Esophagus_Muscularis	22	19929519	A	G	-0.9598	0.0805	1.97e-27
ENSG00000093010	P21964	COMT	Heart_Atrial_Appendage	22	19925166	A	G	-0.8145	0.0942	6.25e-16
ENSG00000093010	P21964	COMT	Heart_Left_Ventricle	22	19925166	A	G	-0.6461	0.0846	4.14e-13
ENSG00000093010	P21964	COMT	Lung	22	19944323	A	G	-0.6316	0.1096	1.74e-08
ENSG00000093010	P21964	COMT	Nerve_Tibial	22	19929519	A	G	-0.7261	0.0495	7.5e-39
ENSG00000093010	P21964	COMT	Pancreas	22	19923153	T	C	-0.3196	0.0489	5.32e-10
ENSG00000093010	P21964	COMT	Pituitary	22	19925166	A	G	-0.8847	0.135	5.87e-10
ENSG00000093010	P21964	COMT	Skin_Not_Sun_Exposed_Suprapubic	22	19951271	G	A	-0.2038	0.0283	3.47e-12
ENSG00000093010	P21964	COMT	Thyroid	22	19919405	C	T	0.2168	0.033	1.57e-10
ENSG00000093010	P21964	COMT	Whole_Blood	22	19934999	T	C	0.1492	0.0248	3.53e-09
ENSG00000147246	P28335	HTR2C	Nerve_Tibial	x	113889839	G	A	-0.2505	0.0437	2.07e-08
